# Supplementary material for: GC-MS-based metabolomics approach to diagnose depression in hepatitis B virus-infected patients with middle or old age
Source: Aging (Albany NY). 2018 Sep 2;10(9):2252–65. doi: 10.18632/aging.101535 (PMC6188484; doi:10.18632/aging.101535)
Supplement: Data set [file aging-10-101535-s002.xls]

## Sheet: data
group	age	HDRS	BMI	medication	sex	(R*,S*)2,3-dihydroxybutanoic acid	1-methylinosine	2,4-dihydroxybutyric acid	2,4-dihydroxypyrimidine	2-ketoglutaric acid	3-hydroxyhippuric acid	3-hydroxyisobutyric acid	3-Methylxanthine	4-hyroxybenzoic acid	acetaldehyde	acetic acid	adenosine	adipic acid	aminoethanol	aminomalonic acid	arabinitol	arabitol	azelaic acid	cysteine	ethanolamine	fructose	Fumaric acid	glucose	glyceric acid	hippuric acid	histidine	homovanillic acid	hydroxylamine	indoxyl sulphate	lactic acid	L-Arginine	leucine	levulinic acid	mannitol	methylmalonic acid	m-Thymol	myristic acid	N-acetyl-D-glucosamine	palmitic acid	p-cresol	phenylalanine	pimelic acid	pseudo uridine	pyroglutamic acid
HB in training set	40	2	18.6	Adefovir dipivoxil	M	0.0511674	0.00287003	0.0081341	0.00301394	0.00236443	0.000461531	0.0510201	0.000703933	0.00531416	0.000616342	0.0318882	0.0318455	0.00208453	0.185275	0.15861	0.0171537	0.0616427	0.00138281	0.0427175	0.00900301	0.0298592	0.00246672	0.00197647	0.00642448	0.0571653	0.00536291	0.145986	0.00940707	0.0536603	0.0801304	0.0408543	0.0146213	0.00117684	0.0388644	0.0657136	0.00729466	0.00141093	0.00489527	0.00338064	0.0315295	0.0256659	0.163754	0.0195275	0.0827163
HB in training set	41	1	28.5	no	F	0.00221029	0.0023676	0.0427333	0.28016	0.00811912	0.107529	0.036857	0.00192072	0.0057431	0.00433834	0.0841257	0.0501948	0.00941674	0.491786	0.0723676	0.0269206	0.030423	0.00124676	0.0285082	0.145359	0.0448006	0.00618716	0.00139493	0.0606808	0.0140123	0.00213479	0.250806	0.00400413	0.0423341	0.0957563	0.0406056	0.192153	0.00977015	0.0210472	0.0508763	0.00766959	0.00102213	0.0099802	0.00510179	0.0404577	0.0519558	0.0307531	0.0283217	0.138967
HB in training set	42	1	19.9	no	F	0.0127452	0.00119503	0.0222011	0.139239	0.005242	0.0885748	0.0481022	0.000962266	0.00344997	0.00150281	0.0146375	0.0284321	0.00301825	0.187264	0.108144	0.0934045	0.0278212	0.00205232	0.0691079	0.0242901	0.0268415	0.000533591	0.000577932	0.0496753	0.0521744	0.00637982	0.0349231	0.00492956	0.0432683	0.124318	0.0381174	0.243636	0.00374568	0.0274625	0.98538	0.00110898	0.000683469	0.00530549	0.0125754	0.0246554	0.074193	0.112997	0.0197866	0.176349
HB in training set	69	2	22.4	no	F	0.199412	0.00142828	0.0296165	0.0840679	0.0021321	0.0251306	0.00893896	0.00197004	0.00818655	0.000950932	0.0510582	0.0391	0.0117337	0.283985	0.0911516	0.0249227	0.0223973	0.00222721	0.0490191	0.132374	0.0718225	0.000615092	0.000816421	0.0743883	0.0459249	0.00622821	0.150488	0.0145665	0.0403698	0.128671	0.0240754	0.0732053	0.00414889	0.0339882	0.37471	0.00507536	0.00119362	0.00419239	0.00546784	0.0364589	0.00895851	0.307012	0.0345479	0.24113
HB in training set	28	0	20.2	no	F	0.0271742	0.00369025	0.0143798	0.108925	0.000406016	0.0289102	0.0389214	0.000264861	0.0196592	0.00280214	0.0955979	0.0558584	0.00467132	0.0621461	0.0397446	0.169655	0.0528322	0.00365117	0.0458974	0.245162	0.0377014	0.00130239	0.000676142	0.0466182	0.0897206	0.0122549	0.472471	0.0112639	0.0329187	0.0432731	0.0617036	0.0299256	0.00471597	0.0399638	0.380368	0.00206491	0.00055636	0.00747222	0.0149652	0.0546367	0.0755245	0.0675428	0.0557763	0.15338
HB in training set	72	1	18.2	no	F	0.0708826	0.00261258	0.00766699	0.0634074	0.00180007	0.00537509	0.0636887	0.00266234	0.00517142	0.00270285	0.0890473	0.0279473	0.00285851	0.318091	0.0724943	0.184087	0.0224554	0.00108193	0.056319	0.0327209	0.036115	0.00282174	0.00192524	0.0704143	0.0478431	0.00352706	0.155981	0.00498586	0.0697059	0.0960808	0.0569267	0.105102	0.00332102	0.0426581	0.211309	0.00249082	0.00131928	0.00855321	0.0107633	0.0269886	0.0680457	0.162395	0.0438471	0.11434
HB in training set	24	1	23.1	no	F	0.158143	0.00292118	0.00658614	0.27968	0.00524668	0.0917676	0.0184022	0.00377407	0.00902352	0.00390062	0.0342193	0.052233	0.00505615	0.0872608	0.175356	0.379663	0.0538969	0.00122575	0.0210298	0.162412	0.0934576	0.00307022	0.00242559	0.10835	0.0485932	0.0189592	0.325346	0.00980427	0.0725298	0.325106	0.0296867	0.102195	0.00615505	0.0365527	0.215671	0.00100765	0.000732436	0.00587675	0.016526	0.041218	0.162324	0.391915	0.0355775	0.157191
HB in training set	44	1	20.7	no	F	0.0971496	0.00116433	0.0176456	0.0732263	0.00498721	0.08187	0.0295894	0.00192668	0.000725596	0.00105296	0.0561929	0.027527	0.000470918	0.37644	0.0233307	0.118197	0.00800061	0.0007061	0.0370781	0.0759115	0.0630475	0.00332858	0.00174561	0.0507031	0.0320658	0.00667811	0.269258	0.0066436	0.0318953	0.0494602	0.0328663	0.0459326	0.00610238	0.0289679	0.352704	0.000387793	0.000652989	0.00100729	0.0117154	0.0318292	0.0128928	0.18085	0.023187	0.0461238
HB in training set	67	0	22.5	no	F	0.112266	0.00115227	0.0227471	0.04155	0.00201538	0.0265145	0.0588061	0.000251003	0.00395789	0.000868208	0.032098	0.0329838	0.00808998	0.144142	0.00701649	0.0711038	0.0309724	1.74715e-05	0.0584372	0.0596788	0.0199754	0.00177529	0.000461426	0.0453541	0.0291613	0.00259157	0.00435277	0.0114111	0.0317291	0.0588269	0.0406967	0.0423671	0.00145685	0.0256805	0.101659	0.00105726	0.0014478	0.00129227	0.00526995	0.0144918	0.0443342	0.115234	0.010163	0.176754
HB in training set	32	1	24.1	no	M	0.0560556	0.00366397	0.017208	0.198764	0.00875531	0.115677	0.0806963	0.00400809	0.0141961	0.00346297	0.0271655	0.0155844	0.00739332	0.462333	0.0109158	0.294367	0.0672069	0.000478321	0.0363544	0.100922	0.0427511	0.00413864	0.000691538	0.077489	0.0570348	0.0249753	0.614304	0.00671386	0.0609966	0.143899	0.0600024	0.000499893	0.00691819	0.0257403	0.794376	0.00561373	0.000401313	0.00387499	0.00523206	0.0428245	0.110079	0.164694	0.0220388	0.0595694
HB in training set	38	2	20.3	Lamivudine	M	0.125343	0.001284	0.0874152	0.0904991	0.00550178	0.104429	0.0170773	0.00309994	0.00330404	0.00188264	0.0302819	0.0170614	0.00514171	0.239597	0.191533	0.156598	0.00851091	0.000688839	0.0104985	0.197378	0.0218425	0.00402359	0.000743728	0.0770352	0.02575	0.00279268	0.0938616	0.00732038	0.0258448	0.0167371	0.0381024	0.0289059	0.00567749	0.0185729	0.364308	0.00236202	0.000814036	0.00699666	0.0101889	0.0275522	0.0122139	0.115578	0.016475	0.162481
HB in training set	56	2	26.8	no	M	0.152359	0.00243389	0.034689	0.0110188	0.00212224	0.0712605	0.0419895	0.00222929	0.00663546	0.00544493	0.100537	0.0597066	0.00429454	0.413024	0.155666	0.287763	0.0276398	0.000986444	0.0422927	0.0669008	0.0136739	0.00596628	0.00122462	0.050632	0.0143732	0.0162685	0.494329	0.00594326	0.0217407	0.374673	0.0413539	0.221149	0.00784424	0.0427138	0.839055	0.00237276	0.00164299	0.00684916	0.0130486	0.0338055	0.091775	0.125082	0.0607667	0.159527
HB in training set	65	0	27.2	no	M	0.209016	0.0014533	0.042797	0.0348306	0.00348314	0.0903361	0.0717231	6.91936e-05	0.00805597	0.00325682	0.0778144	0.0108574	0.00903431	0.511219	0.234197	0.265711	0.0192435	0.0030078	0.0217296	0.0184066	0.061932	0.00444265	0.00114894	0.0257416	0.0477681	0.00966216	0.276324	0.00464501	0.0526363	0.275378	0.0343729	0.274019	0.00454569	0.0551866	0.510591	0.00216447	0.000744053	0.00914294	0.0108418	0.0322838	0.087569	0.175117	0.0273708	0.12301
HB in training set	45	2	24.7	no	M	0.054882	0.00149702	0.0119742	0.220446	0.00114188	0.0878357	0.0313295	0.00225192	0.000371124	0.00117069	0.0648746	0.0264231	0.0140997	0.421119	0.138736	0.168984	0.0540608	0.00301138	0.0613746	0.287234	0.0492477	0.000950885	0.000158664	0.0916237	0.0812241	0.00515218	0.336137	0.015335	0.0188972	0.254389	0.0587901	0.159081	0.0176531	0.0402757	1.13169	0.00222118	0.00131374	0.00729112	0.00886591	0.0638054	0.0619985	0.394282	0.0152889	0.067598
HB in training set	57	0	27.3	no	M	0.125127	0.00246334	0.0216286	0.0196772	0.00233105	0.0332191	0.0194045	0.000912551	0.00120661	0.00372069	0.0188587	0.0164103	0.00322321	0.398274	0.0835237	0.107585	0.0133602	0.00195641	0.0570242	0.140549	0.0141893	0.00261094	0.00147922	0.0129768	0.0717267	0.015085	0.359541	0.00736228	0.00588631	0.265788	0.0252373	0.0561456	0.00761325	0.0315189	1.05799	0.00978545	0.000274937	0.00968395	0.00651151	0.0426838	0.00129544	0.251683	0.0332207	0.21106
HB in training set	41	3	29	no	M	0.0566045	0.000370457	0.0129378	0.114094	0.00266378	0.0708452	0.00284874	0.00155537	0.00275359	0.000731073	0.144555	0.0460485	0.000430635	0.39867	0.135709	0.0140805	0.0444936	0.00160659	0.0449768	0.284404	0.0436801	0.00340114	0.000812694	0.0696566	0.130351	0.0160448	0.445905	0.0171311	0.0890093	0.107133	0.0362969	0.322168	0.00296751	0.0195675	0.419858	0.00424463	0.00113368	0.00590923	0.012799	0.052574	0.0169602	0.422207	0.0339564	0.109815
HB in training set	48	2	22.4	no	F	0.152153	0.0038963	0.0280947	0.126854	2.9804e-05	0.0710272	0.0587809	0.000319422	0.00348956	0.00032519	0.157165	0.0349532	0.00476201	0.167036	0.17765	0.000478843	0.0368577	0.00255676	0.0840534	0.563596	0.0442352	0.00541603	0.000286108	0.104749	0.0749455	0.0156932	0.448214	0.0178691	0.0495007	0.135082	0.0468242	0.0892045	0.000595537	0.0442574	0.667409	0.0054007	9.69945e-05	0.00703027	0.0129797	0.0438348	0.0771483	0.19404	0.0137778	0.302599
HB in training set	53	3	17.7	no	F	0.0992535	0.00217336	0.00765223	0.050967	0.00653258	0.0217656	0.00268063	0.000447429	0.000845956	0.00163977	0.0202576	0.0246644	0.00491688	0.308016	0.034248	0.0110918	0.0211951	0.0019748	0.0327657	0.130691	0.0270185	0.00413116	0.00140485	0.0518519	0.0227518	0.0105317	0.0553289	0.00841423	0.00184777	0.0759354	0.0205683	0.0333753	0.00234985	0.0285187	0.0250033	0.000379755	5.03829e-05	0.00020211	0.00741412	0.0311303	0.0831049	0.145713	0.0173509	0.114786
HB in training set	57	1	27.3	no	F	0.126715	0.00332997	0.0293109	0.263975	0.00824616	0.0156487	0.0493678	0.00240526	0.00606467	0.00275954	0.0631177	0.0419111	0.0146673	0.286369	0.0171451	0.486952	0.0408883	0.00113567	0.0480203	0.0277899	0.0407763	0.00399516	7.04485e-05	0.100659	0.0531935	0.0200254	0.289136	0.00966828	0.000764886	0.145437	0.0448653	0.062061	0.00597327	0.0307415	0.461581	0.00488496	0.000458685	0.00996993	0.0152249	0.0545953	0.0496658	0.377974	0.030882	0.343668
HB in training set	44	2	27	no	M	0.0802081	0.00207904	0.0288473	0.124681	0.00504074	0.251557	0.0893651	0.000746955	0.0123888	0.00427863	0.00973791	0.0271375	0.00617151	0.566149	0.0800151	0.0983903	0.040729	0.00056058	0.0570407	0.15238	0.0458226	0.00436866	0.000392495	0.127319	0.0504524	0.00663351	0.09473	0.0141433	0.0591924	0.01945	0.0350782	0.046811	0.00176465	0.0155613	0.160217	0.0123578	0.00116953	0.0105331	0.0125374	0.0348244	0.0846591	0.146357	0.0169518	0.151514
HB in training set	62	2	25.6	no	F	0.164662	0.00143003	0.0387223	0.0967869	0.00323844	0.126301	0.127996	0.00177158	0.00981161	0.00491873	0.220554	0.0402503	0.00417483	0.790734	0.290949	0.317417	0.0974759	0.0038045	0.0507452	0.312965	0.0258696	0.00421418	0.000999217	0.1564	0.0409264	0.0205416	0.952616	0.0148404	0.000427208	0.263742	0.0628901	0.0778583	0.0131579	0.0352409	0.190307	0.0156913	0.00241536	0.00291339	0.0194267	0.0669734	0.14236	0.150561	0.0182659	0.206227
HB in training set	28	2	25.1	no	M	0.216869	0.00210948	0.0768943	0.172992	0.00931095	0.148536	0.0873499	0.00101833	0.0218732	0.00344068	0.130859	0.0636597	0.0130753	0.655259	0.214815	0.2117	0.0608464	0.0007016	0.0816723	0.207508	0.0784154	0.0118871	0.0028983	0.0375179	0.154673	0.00246813	0.463153	0.026424	0.0540528	0.226554	0.110665	0.259003	0.0191941	0.0519132	1.02168	0.0141711	0.000569426	0.0116144	0.0239815	0.0453053	0.163186	0.343054	0.0871002	0.184398
HB in training set	67	2	20.2	no	M	0.0216235	0.00185727	0.00509216	0.033954	0.00216303	0.0418781	0.00931904	0.00207283	0.00481965	0.001086	0.00610249	0.021443	0.00561917	0.372435	0.0544801	0.0933645	0.0302661	3.17725e-05	0.0223799	0.15021	0.0158469	0.00190383	0.000278705	0.0516835	0.00374528	0.0213237	0.31422	0.00976405	0.0351164	0.135798	0.0184075	0.0777521	0.000385179	0.0198038	0.29854	0.00744228	0.00151669	0.00308603	0.00828212	0.0151637	0.0596031	0.0380649	0.0283548	0.0949547
HB in training set	59	2	18.3	no	M	0.132032	0.00160501	0.0145535	0.00608876	0.0030036	0.0331922	0.0196333	0.00165644	0.00285496	0.00239377	0.0208779	0.0039514	0.00931432	0.387903	0.102876	0.00317145	0.00779419	7.988e-05	0.043171	0.0314919	0.0158255	0.00294374	0.00130904	0.000930377	0.029477	0.00996736	0.251908	0.00187245	0.046996	0.0634226	0.0333539	0.0517212	0.00209469	0.0380095	0.431616	0.00113169	0.00015236	0.00110327	0.00857717	0.032814	0.0205367	0.190834	0.0198219	0.119243
HB in training set	23	3	27.3	Adefovir dipivoxil	F	0.126135	0.00222315	0.0200576	0.158551	0.00536447	0.0644245	0.077983	0.00288496	0.0113352	0.000621951	0.154218	0.0544603	0.00423334	0.390527	0.0972611	0.113847	0.0711958	0.000587688	0.0485453	0.122804	0.0483915	0.0050532	0.000140714	0.000947569	0.0599515	0.0137371	0.367825	0.0121384	0.0627841	0.273481	0.0271898	0.159148	0.00177862	0.0640938	0.523485	0.00437769	6.98567e-05	0.00154069	0.00712282	0.0518727	0.112046	0.180185	0.0356434	0.141541
HB in training set	70	3	18.2	no	M	0.0692319	0.00235837	0.0153655	0.0214859	0.00116205	0.0662743	0.0295794	0.00151232	0.0024156	0.00217061	0.0629351	0.0151895	0.00148473	0.14646	0.054372	0.1182	0.00526173	0.00154165	0.0368485	0.121789	0.0135664	0.00264733	0.000298973	0.059773	0.0117394	0.0104208	0.0949318	0.00952992	0.0099772	0.152105	0.0352031	0.100748	0.0013669	0.0290831	0.340986	0.0086251	0.000465945	0.00271444	0.0082534	0.023748	0.0316686	0.00354012	0.00138547	0.0914998
HB in training set	42	3	27.5	no	F	0.34836	0.00677198	0.00869217	0.17986	0.00609487	0.0222705	0.0638244	0.00285303	0.0145891	0.00543377	0.0421978	0.0171431	0.00227194	0.642577	0.265655	0.370882	0.104362	0.00158789	0.0581414	0.34247	0.0333408	0.00615189	0.00273138	0.180558	0.102825	0.0367278	0.0836913	0.0174509	0.0268342	0.262154	0.0912922	0.0837558	0.00386824	0.0664331	0.370068	0.00233274	0.00246134	0.0029321	0.0148402	0.0342807	0.215068	0.0750858	0.0671951	0.453664
HB in training set	29	2	15.7	no	F	0.0411816	0.002103	0.0220135	0.252163	0.00597856	0.137418	0.044203	0.00125193	0.00173773	0.00307982	0.00621562	0.0409065	0.00916552	0.394503	0.0480759	0.126807	0.0254945	0.00159323	0.0574055	0.124533	0.0292327	0.00366397	0.000324699	0.049824	0.019988	0.0219493	0.196343	0.00456839	0.0299144	0.0858653	0.0508152	0.0370193	0.0089623	0.0132432	0.470185	0.00974161	0.000248942	0.000639522	0.0121078	0.0540332	0.0623509	0.0459039	0.0372338	0.168128
HB in training set	28	2	19.3	no	M	0.0694462	0.00209693	0.0111411	0.0485317	0.000349481	0.0530588	0.0794049	0.000452099	0.011689	0.00398604	0.0891921	0.0230299	0.0061962	0.366268	0.0903378	0.107775	0.00400233	0.00287565	0.0375962	0.1546	0.0284093	0.00387079	0.000390064	0.0384741	0.0300821	0.0210958	0.320134	0.00588855	0.00318671	0.116311	0.0554711	0.141483	0.00591691	0.0391938	0.969908	0.00941939	0.000972269	0.00594019	0.0118683	0.0260162	0.0107613	0.174677	0.0348321	0.0719604
HB in training set	68	1	24.7	no	F	0.0917919	0.00114475	0.0145212	0.122202	4.70188e-05	0.00356464	0.0736571	8.03324e-05	0.00287996	0.00202988	0.0605806	0.0468809	0.00173509	0.320995	0.12872	0.0875875	0.0544757	8.14325e-05	0.0214017	0.0540784	0.0291148	0.00588033	0.0011681	0.03145	0.0229531	0.0139774	0.346656	0.00794291	0.0148452	0.0739247	0.0264096	0.0819321	0.000823142	0.0494113	0.341118	0.00492555	0.000111258	0.00390708	0.00978935	0.0083434	0.0557268	0.0644881	0.0110903	0.115722
HB in training set	37	1	27.6	no	F	0.124979	0.000230183	0.00919075	0.000357744	0.00461661	0.0405265	0.0193458	0.00138418	0.00407219	0.00101452	0.0416535	0.00419561	0.00171247	0.0970945	0.091928	0.0189999	0.0110422	0.00209789	0.0312902	0.00702763	0.0268301	0.000293522	0.00102783	0.0558835	0.0292103	0.000405673	0.050234	0.00550858	0.0185899	0.0516606	0.0238175	0.0883289	0.00132115	0.0171176	0.723752	0.000517088	0.000566479	0.00750689	0.00584304	0.0259182	0.0365041	0.103003	0.00881469	0.0327846
HB in training set	62	2	26.9	no	M	0.102732	0.00299801	0.0206502	0.0254768	0.0005092	0.00417016	0.052758	0.000884744	0.00554211	0.00130284	0.0365414	0.0098481	0.00953795	0.282578	0.126155	0.050291	0.0149193	0.00128027	0.0264616	0.235359	0.068394	0.00455108	0.000632095	0.0533166	0.0493946	0.00919904	0.323784	0.0126987	0.000157056	0.170325	0.053618	0.0398455	0.00265835	0.027808	0.0793338	0.0107004	0.00131418	0.00471607	0.0144116	0.0270263	0.0552535	0.333365	0.0313304	0.163102
HB in training set	54	3	17.4	no	M	0.108866	0.00155586	0.000445034	0.165475	0.00489024	0.0469738	0.0350035	0.000257215	0.00275896	0.00152542	0.0593584	0.0345045	0.00336702	0.0718452	0.0880443	0.17829	0.00681789	0.000140069	0.0109391	0.101309	0.0516191	0.00121294	0.000700787	0.04956	0.0412842	0.0111671	0.298611	0.0079497	0.000548055	0.0230907	0.0203042	0.149549	0.00314828	0.037758	0.698928	0.000617422	0.000469965	0.00362907	0.00708619	0.0540192	0.014526	0.206835	0.0130171	0.128935
HB in training set	46	3	17.3	no	M	0.248262	0.00138473	0.039788	0.348017	0.00590335	0.0909229	0.0561347	0.00241443	0.00709506	0.000974332	0.129116	0.0510087	0.0175361	0.556786	0.148803	0.00688195	0.0091589	0.00126266	0.0791685	0.298734	0.0745632	0.00735757	0.000619299	0.0284154	0.072456	0.0069407	0.182563	0.0170949	0.04425	0.0988833	0.0617044	0.111434	0.00171556	0.0726078	1.02671	0.00748135	0.000888741	0.00306243	0.0133482	0.0218604	0.0214773	0.212867	0.0551779	0.202887
HB in training set	26	3	17.5	interferon	M	0.0400062	0.00123824	0.043078	0.135106	0.00311774	0.0362583	0.0022851	0.00207912	0.00276573	0.00317235	0.0375894	0.0538948	0.00479406	0.461386	0.158659	0.0457007	0.035042	0.00159588	0.0414394	0.0545371	0.0167596	0.00485976	0.0012177	0.00121538	0.0486621	0.00336788	0.446249	0.0132772	0.0252767	0.136809	0.0336806	0.0462111	0.00545725	0.0569292	0.757091	0.00350732	0.000328104	0.00977492	0.0105123	0.0508813	0.043477	0.196711	0.0528232	0.269618
HB in training set	52	0	19	no	F	0.0690776	0.0013899	0.0318538	0.171372	0.00761334	0.0108389	0.0368066	0.000972349	0.00431061	0.00140903	0.0189022	0.0247564	0.00792635	0.0485997	0.215005	0.142084	0.0426632	1.25283e-05	0.0200959	0.0445989	0.0272758	0.00157933	0.00117447	0.0343234	0.0125218	0.00893387	0.0360868	0.00603372	0.0258969	0.182831	0.0505711	0.0688994	0.000295319	0.0401665	1.18224	0.00588447	0.00177319	0.00939025	0.00474071	0.0279774	0.0628744	0.112288	0.0269547	0.060893
HB in training set	29	2	23	no	M	0.170011	0.00394082	0.00572814	0.327159	0.0162074	0.187072	0.0905653	0.00121555	0.00785168	0.00413386	0.127934	0.0907317	0.000917386	0.521343	0.0984144	0.100314	0.0778357	0.00233915	0.0780674	0.282018	0.106905	0.00122015	0.000197218	0.0460785	0.0616202	0.0213598	0.342454	0.0191138	0.0132101	0.640949	0.0795552	0.0299747	0.0185527	0.0591225	0.794175	0.00568611	0.00221342	0.0124449	0.0156722	0.0206477	0.124041	0.452814	0.0252397	0.285914
HB in training set	65	2	17.8	no	M	0.0698339	0.00133478	0.0315283	0.170129	0.00708787	0.00859619	0.0362811	0.000887224	0.00407862	0.00117703	0.0183768	0.0239309	0.00769435	0.0459102	0.214479	0.14084	0.0421377	-7.15973e-05	0.0195704	0.0423563	0.0260321	0.00134734	0.00108934	0.033798	0.0119963	0.00840839	0.0348431	0.00550824	0.0253715	0.181587	0.0495582	0.0683739	0.000285358	0.039641	1.17878	0.00565248	0.00168807	0.00930512	0.00465559	0.0276519	0.0616307	0.110046	0.0264292	0.0596493
HB in training set	39	3	27.4	no	F	0.131858	0.00223337	0.0281432	0.238264	0.00433728	0.123448	0.0337376	0.00152796	0.00431374	0.00435098	0.0557602	0.0280262	0.00567638	0.513644	0.198918	0.114701	0.0114895	0.000881851	0.0275635	0.110899	0.0588549	0.00563526	0.000485181	0.0846303	0.0531925	0.0148019	0.199943	0.0172442	0.0163053	0.247895	0.0574088	0.160074	0.00575428	0.0334018	0.970318	0.0130697	0.00134788	0.00868359	0.0115077	0.0269288	0.0868634	0.0331028	0.0327079	0.0774601
HB in training set	46	0	19.6	no	F	0.130586	0.00139137	0.0239346	0.00888921	0.00112419	0.030032	0.0324885	0.00161328	0.00368713	0.00218323	0.0741241	0.0324251	0.00656681	0.49847	0.153296	0.175737	0.026333	0.00175264	0.0263659	0.164879	0.0282176	0.00430455	0.00114755	0.0653089	0.0250943	0.0171199	0.298326	0.00893715	0.0154782	0.0626324	0.0322087	0.0796328	0.0041588	0.0300326	0.39693	0.00819481	0.00064768	0.00322749	0.00699537	0.0151704	0.0528487	0.169799	0.00611834	0.0678639
HB in training set	52	1	23	no	M	0.166191	0.00353594	0.0255851	0.220582	0.00283694	0.0542266	0.071424	0.00108925	0.00681961	0.00364443	0.00930856	0.0372677	0.00157281	0.168833	0.154272	0.119793	0.0714889	0.00100372	0.032886	0.197538	0.101599	0.00680522	0.00114931	0.160042	0.0107467	0.00828051	0.226771	0.00734306	0.0844384	0.0804579	0.0512962	0.000419385	0.0036079	0.00777021	0.6405	0.00790866	0.00135638	0.00725654	0.00589848	0.0310633	0.184974	0.0963284	0.0243106	0.191575
HB in training set	30	3	21	no	F	0.0106133	0.00153214	0.0401971	0.106262	0.00245547	0.0169901	0.0477313	0.000662619	0.00197835	0.000322273	0.0579339	0.0392925	0.00515185	0.217147	0.0293576	0.0396839	0.0273273	0.000297212	0.026112	0.231555	0.0216359	0.00560714	0.000608107	0.072012	0.0525379	0.0178625	0.113907	0.0104385	0.0545225	0.0844258	0.0163527	0.0469953	0.00431587	0.0257777	0.0387847	0.00463901	0.000780478	0.0023123	0.00774028	0.0353347	0.0858897	0.125846	0.0264365	0.220537
HB in training set	27	0	27.6	no	M	0.1202	0.00224506	0.00919392	0.205756	0.00354009	0.0693611	0.0679587	0.00174288	0.0108647	0.00293205	0.210875	0.00131801	0.0123068	0.394831	0.0982257	0.256441	0.00338572	0.00226426	0.0498483	0.327823	0.0766397	0.00273047	0.00150704	0.0718227	0.0264199	0.00783246	0.0658571	0.00117204	0.0311611	0.0397455	0.082473	0.0305135	0.00498756	0.034709	0.205125	0.00311308	0.000270498	0.0110135	0.0161597	0.0245744	0.0713465	0.386792	0.0182735	0.0723279
HB in training set	52	3	27	no	F	0.0736761	0.000918292	0.0121807	0.187817	0.00173759	0.196057	0.0542873	0.000748421	0.0071754	0.00162327	0.0360828	0.0111773	0.00121149	0.222289	0.107748	0.0090805	0.017449	0.00078509	0.042766	0.087376	0.0480965	0.00328308	0.000131297	0.045871	0.0238121	0.00644243	0.18515	0.00756661	0.0133101	0.0673536	0.0283438	0.0224328	0.011035	0.0224637	0.187262	0.0105951	0.00100031	0.000945996	0.00573075	0.0152733	0.0349428	0.188862	0.0302585	0.116021
HB in training set	37	2	24.8	no	F	0.0174128	0.001026	0.00334523	0.115396	0.00364962	0.0534044	0.0135685	0.000812812	0.00236425	0.000641483	0.00556687	0.00228057	0.00571875	0.238759	0.0585126	0.159551	0.0164376	0.000168637	0.0239339	0.0370806	0.030323	0.000305039	0.000415781	0.00461978	0.0177859	0.0114268	0.10282	0.0033979	0.00425352	0.115595	0.0252827	0.126897	0.00563553	0.0274188	0.438152	0.000110641	0.000774287	0.000432738	0.00598396	0.0126763	0.043394	0.00271599	0.00936436	0.0586721
HB in training set	50	1	21.1	no	F	0.0872187	0.00114952	0.00108245	0.0456881	0.00599593	0.121941	0.0563788	0.00216324	0.00463598	0.00348614	0.102912	0.045786	0.000440709	0.282864	0.0631455	0.0742644	0.0449408	0.00203312	0.0322677	0.12136	0.0195103	0.00401664	0.000234231	0.082925	0.0141019	0.0134552	0.454983	0.00313051	0.0061203	0.180917	0.0254835	0.0231889	0.000977506	0.0316207	1.01455	0.000604487	0.00097484	0.00389338	0.0152126	0.0429084	0.00568219	0.251488	0.0209264	0.141387
HB in training set	25	1	18.8	no	F	0.197824	0.00412969	0.0510359	0.0408895	0.00357052	0.0863438	0.0562275	0.00126304	0.0173398	0.000241523	0.100025	0.0396064	0.0116659	0.509262	0.0550266	0.141539	0.0288258	0.00261275	0.0634712	0.233666	0.00338793	0.0044484	0.0008536	0.134114	0.0804962	0.00481748	0.232022	0.0347478	0.0652254	0.251224	0.0429816	0.302532	0.00825119	0.0854968	0.510059	0.00818932	0.00035471	0.00457627	0.0206734	0.037592	0.0695221	0.250825	0.0338313	0.111562
HB in training set	43	3	24.8	telbivudine	F	0.346591	9.93472e-05	0.0680053	0.154917	0.00571762	0.293033	0.0239975	0.00310927	0.00893836	0.00386939	0.120792	0.0264277	0.0123326	0.247731	0.0717164	0.149867	0.00493621	0.00184909	0.0703026	0.29677	0.0305616	0.00724	0.00139634	0.102973	0.0730121	0.00911207	0.774197	0.0171356	0.0596207	0.0997516	0.110596	0.132369	0.0055401	0.0652234	0.94936	0.0136166	0.000992767	0.0146068	0.0234761	0.0481369	0.0761475	0.292914	0.0535733	0.17363
HB in training set	67	0	28	no	F	0.0222504	0.0015499	0.00815521	0.0781497	0.00139285	0.0231734	0.038021	4.66435e-05	0.0049446	0.00159179	0.0370564	0.0394227	0.00820561	0.217672	0.14497	0.0927394	0.0209363	0.00128948	0.0207317	0.0517228	0.0053253	0.000397765	0.000529936	0.0303316	0.0241779	0.000593671	0.0800563	0.00658983	5.90273e-05	0.0339432	0.0288231	0.0175443	0.00209123	0.0288261	0.070783	0.00375238	0.00100334	0.00430944	0.00425321	0.0261532	0.00107383	0.0364178	0.0292403	0.139697
HB in training set	33	2	25.9	no	M	0.122045	0.00324181	0.0152315	0.184344	0.00378913	0.0583932	0.0657669	0.00202621	0.00779415	0.00299184	0.0881455	0.0167225	0.00266469	0.416145	0.123504	0.0919875	0.0435101	0.00146674	0.0372222	0.105129	0.0301147	0.000484969	0.000960132	0.0372301	0.0300737	0.0182753	0.0689464	0.0116006	0.0135521	0.147895	0.0545878	0.010721	0.00152081	0.0203536	0.404834	0.00489288	0.0018226	0.00490376	0.0155985	0.028784	0.0677285	0.325804	0.0275165	0.130216
HB in training set	40	2	20	interferon	M	0.169342	0.00402744	0.0141537	0.0619637	0.00526882	0.199655	0.0180542	4.24602e-05	0.00773415	0.00476236	0.012192	0.0431346	0.00232217	0.133269	0.162983	0.153063	0.0161931	0.00301113	0.0478388	0.0290927	0.0162896	0.0045171	0.00176016	0.0506831	0.0203469	0.00990639	0.0206733	0.00852945	0.0357228	0.0425067	0.0300272	0.0318587	0.00628575	0.0493738	0.480147	0.00149291	0.00180891	0.00191597	0.0160769	0.0202013	0.071343	0.00302639	0.0218677	0.166464
HB in training set	25	3	19.7	no	F	0.011857	0.00161726	0.0407226	0.107505	0.00298094	0.0182338	0.0482568	0.000747743	0.00206347	0.000407398	0.0584594	0.0398179	0.00523698	0.218391	0.0298831	0.0409276	0.0278528	0.000382336	0.0266375	0.232799	0.0228796	0.00569227	0.000693232	0.0725375	0.0530634	0.018388	0.115151	0.0109639	0.0550479	0.0856695	0.0168782	0.0475207	0.00427175	0.0263032	0.0422434	0.00472413	0.000865603	0.00239743	0.00782541	0.0358602	0.0871334	0.127089	0.0269619	0.221781
dHB in training set	21	24	21.7	Lamivudine	M	0.119327	0.00378522	0.0503006	0.243231	0.0049899	0.134171	0.065565	0.00223715	0.00526387	0.00226482	0.0434965	0.0440334	0.0103671	0.326004	0.0340721	0.0890454	0.0597367	0.00351685	0.0601686	0.158286	0.0378143	0.00300467	0.00113371	0.053994	0.0089963	0.0191474	0.369129	0.0108013	0.053627	0.407318	0.0701937	0.106597	0.0114701	0.0258357	0.619314	0.00864618	0.000850985	0.00851556	0.0149981	0.0338432	0.108709	0.25707	0.0232062	1.32654
dHB in training set	55	28	23.9	no	M	0.0063817	0.00268899	0.0297253	0.0886265	0.0039428	0.0894869	0.0058805	0.00204468	0.00818359	0.000803663	0.0163889	0.0371013	0.0100739	0.323915	0.101408	0.00373385	0.0116966	0.00168252	0.0329549	0.0255824	0.0334819	0.00375263	0.000703741	0.0607492	0.0142019	0.0186374	0.0537994	0.00568823	0.0358837	0.161638	0.0164677	0.13943	0.010196	0.0214207	0.079483	0.00087869	7.50074e-05	0.00601369	0.00294457	0.00256797	0.0388586	0.0638328	0.00807602	0.0927613
dHB in training set	58	18	25.7	no	F	0.184944	0.00290662	0.0380922	0.225241	0.00369688	0.244308	0.174099	9.79028e-05	0.00496144	0.00536535	0.0926853	0.0350407	0.0115737	0.882269	0.102983	0.0172432	0.0741729	0.00394692	0.057475	0.243015	0.0741041	0.0120198	0.000706552	0.0314193	0.0636446	0.0237968	0.571639	0.00177286	0.0801925	0.581453	0.0914336	0.0385136	0.00878788	0.0746957	0.398009	0.0155073	0.00582782	0.00181555	0.0146412	0.0534474	0.177384	0.550953	0.0670529	0.316779
dHB in training set	26	29	16.1	no	F	0.100018	0.000945472	0.013927	0.0939075	0.00564844	0.0935619	0.073337	0.000955288	0.00117458	0.00122095	0.032697	0.0116951	0.00893932	0.261364	0.0137221	0.032264	0.00840156	0.000775009	0.0401635	0.0804121	0.0644536	0.00404224	0.00141475	0.0452501	0.0524759	0.0048902	0.212788	0.0090209	0.00322296	0.0567849	0.0365736	0.148363	0.0214706	0.0272914	0.257234	0.0036716	0.000616871	0.00294762	0.00552538	0.0365069	0.0584621	0.334777	0.0247946	0.133298
dHB in training set	48	17	23	no	M	0.163433	0.00201135	0.0170857	0.0209689	0.00124645	0.0071901	0.101619	0.00156329	0.00715527	0.000137011	0.0152435	0.0212256	0.00742612	0.430206	0.00510467	0.0468201	0.0425467	0.00272866	0.053567	0.00540049	0.0130342	0.00401336	0.000790701	0.00682423	0.0504407	0.00659504	0.247701	0.00592078	0.00309908	0.0604103	0.0500253	0.0983597	0.00787979	0.0155754	0.209527	0.000840743	0.00125659	0.00660319	0.0145444	0.0328795	0.0811182	0.0512635	0.0249357	0.0953762
dHB in training set	32	22	21.3	no	F	0.0656508	0.00614774	0.0285007	0.0131614	0.000485712	0.14056	0.110848	0.00262448	0.0107385	0.00620492	0.248288	0.0525941	0.0302016	0.692477	0.155518	0.364079	0.0916791	0.00261138	0.12178	0.0837792	0.142021	0.0102059	0.001344	0.0897659	0.148606	0.0497522	0.547986	0.0380991	0.107152	0.225167	0.0816779	0.29456	0.0112771	0.0485423	0.419799	0.00137932	0.00299596	0.00699401	0.0264001	0.0678091	0.214595	0.557401	0.0877406	0.111307
dHB in training set	63	25	23	Lamivudine	M	0.285335	0.00391146	0.0323928	0.282303	0.00396315	0.111577	0.0991414	0.00180816	0.0146047	0.00281501	0.195165	0.116372	0.0312636	0.818421	0.0277144	0.227771	0.0368951	0.00433732	0.0018069	0.0869795	0.218545	0.00987936	0.00341701	0.155336	0.0924829	0.01471	0.132575	0.0255721	0.0742847	0.0384399	0.0650477	0.70127	0.00347099	0.104489	0.608205	0.013207	0.00101638	0.0027873	0.0209796	0.0899269	0.0915188	0.307878	0.0539288	0.424133
dHB in training set	68	27	16	no	F	0.057933	0.00270532	0.0471066	0.266783	0.00190665	0.0212081	0.0939621	0.00217463	0.00526264	0.00183372	0.11493	0.0511188	0.0172989	0.455251	0.211839	0.39937	0.060797	0.00392866	0.0472948	0.101016	0.0796367	0.00674749	4.74047e-05	0.0771132	0.0171414	0.043576	0.338162	0.0110535	0.1336	0.284872	0.0493859	0.134224	0.0114929	0.0467573	0.549769	0.0115017	0.00267504	0.00684193	0.016163	0.052016	0.120644	0.440812	0.0553451	0.207011
dHB in training set	20	23	25.8	no	M	0.100552	0.00333265	0.0259033	0.178308	0.011193	0.143307	0.0672672	0.00542311	0.0140889	0.00520021	0.0657904	0.0304689	0.00173361	0.802059	0.303222	0.171405	0.107977	0.00423776	0.117929	0.239341	0.122703	0.00958178	0.00163934	0.0427722	0.196435	0.0681194	0.452501	0.00700635	0.0439401	0.649046	0.0769674	0.0780849	0.00227206	0.130568	0.422898	0.0126797	0.000619325	0.00302893	0.0228889	0.093848	0.00470738	0.627574	0.0430201	0.440391
dHB in training set	38	28	18.6	no	F	0.0905916	0.002084	0.0107745	0.087654	0.00419684	0.144623	0.0504525	0.0014686	0.00703722	0.00312115	0.125478	0.0260226	0.0124178	0.463142	0.118782	0.0491878	0.0142646	0.00076319	0.0434419	0.10236	0.0190674	0.00290498	7.07946e-05	0.0044908	0.0253793	0.0148444	0.120375	0.0158813	0.054001	0.0668083	0.0517418	0.155353	0.0150548	0.0357839	0.0691129	0.00199067	0.000709291	0.00726426	0.00388838	0.032041	0.0466553	0.0565692	0.0280048	0.220677
dHB in training set	31	23	24.3	no	M	0.0857442	0.00388765	0.0179377	0.0327306	0.00189516	0.127	0.0893823	0.00101614	0.00541997	0.00257208	0.0180341	0.0309231	0.0102395	0.170251	0.0202999	0.035566	0.0209584	0.00154595	0.0755737	0.00464178	0.0347127	0.00592682	0.00196592	0.0758191	0.0148724	0.0185677	0.265256	0.0136316	0.0102586	0.0393379	0.0311891	0.0779611	0.0062679	0.0398871	0.0903873	0.0121126	0.000205966	0.00451845	0.00437073	0.0319974	0.0744196	0.239013	0.00896219	0.137297
dHB in training set	72	19	22.3	no	M	0.270521	0.00371294	0.0243339	0.175185	0.00233474	0.0547474	0.0778477	0.00330915	0.0166009	0.00506752	0.0733018	0.0502342	0.00239144	0.0388449	0.0940151	0.285804	0.0475881	0.00262477	0.0684558	0.043753	0.119892	0.00527583	0.000437854	0.0295138	0.0795328	0.0496159	0.0410675	0.0181525	0.0159746	0.2215	0.0524615	0.0878185	0.0151386	0.0278089	0.254761	0.00393342	0.001174	0.00188687	0.0225715	0.011238	0.0460098	0.359933	0.0897506	0.0965409
dHB in training set	42	28	22.4	no	M	0.3286	0.00508598	0.042437	0.270747	0.00440739	0.138824	0.151732	0.00366257	0.0150324	0.00287053	0.0812702	0.107473	0.00767978	0.706823	0.0783416	0.331911	0.0512656	0.00360456	0.0570946	0.107173	0.0261691	0.00511046	0.0019486	0.0976139	0.0328828	0.0212098	0.647244	0.0289914	0.121175	0.0514905	0.105481	0.410363	0.0109476	0.0557102	0.342255	0.0172271	0.0027077	0.00265664	0.0254522	0.0888407	0.229547	0.175355	0.040395	0.251886
dHB in training set	37	21	16.5	no	F	0.208769	0.00361303	0.0475192	0.174921	0.00202193	0.0997331	0.0751887	0.000968324	0.0067417	0.00591381	0.0553512	0.0182142	0.00816891	0.664536	0.0272173	0.219016	0.0543773	0.00121836	0.142036	0.212236	0.125899	0.0144538	0.00172312	0.146424	0.138723	0.0255096	0.0701655	0.0204031	0.107345	0.198007	0.0942395	0.255977	0.0123888	0.0832648	0.614238	0.0309095	0.00325126	0.0123107	0.0317106	0.12589	0.0712253	0.431328	0.0588951	0.310215
dHB in training set	31	23	23.7	no	F	0.202944	0.00448212	0.000826965	0.18323	0.0144586	0.162368	0.0593048	0.0032073	0.0104542	0.00222361	0.0565488	0.0452328	0.0196423	0.64117	0.231417	0.185888	0.103908	0.00770507	0.0384703	0.190079	0.00921113	0.00690002	0.0015795	0.116144	0.0993081	0.0408415	0.174233	0.0166751	0.0485198	0.385632	0.0785429	0.263084	0.00100523	0.0624963	0.0747773	0.0191012	0.00163237	0.0167054	0.0155742	0.00712008	0.13123	0.242779	0.0509196	0.254052
dHB in training set	35	30	27.3	no	F	0.0638324	0.00159953	0.0269111	0.0908031	0.0019864	0.00868704	0.0903589	0.00286906	0.00277439	0.00357699	0.0206304	0.0265341	0.00925967	0.311598	0.0297644	0.0680594	0.00597867	0.00315567	0.0614021	0.0880283	0.0128246	0.00500632	2.44011e-05	0.0273305	0.0739161	0.025266	0.563394	0.0101769	0.00658336	0.0628115	0.0825256	0.0876485	0.0199758	0.0281244	0.326694	0.00772151	0.000663746	0.00944188	0.0190947	0.00425427	0.177068	0.311099	0.0364026	0.298491
dHB in training set	64	20	24.6	interferon	M	0.435244	0.00253828	0.0214629	0.150082	0.0120508	0.241827	0.0863754	0.00349039	0.00399599	0.00678584	0.0329249	0.0632016	0.0307844	0.790475	0.414283	0.414995	0.0848956	0.00146913	0.0681316	0.150542	0.0753261	0.00651869	0.00277969	0.105448	0.0924992	0.0636316	0.467566	0.0178468	0.0975865	0.135242	0.0641162	0.110325	0.018557	0.075417	1.5437	0.0215872	0.00136238	0.00989466	0.0203665	0.0814023	0.0555209	1.04209	0.0542248	0.270024
dHB in training set	21	25	22.6	no	F	0.0750868	0.0043449	0.020427	0.0898877	0.00928667	0.182314	0.125736	0.00130155	0.00560744	0.00386934	0.0277185	0.0318841	0.0216164	0.814627	0.240309	0.262784	0.00570763	0.00344874	0.0604945	0.272818	0.0129079	0.00401449	0.00272231	0.14916	0.0972313	0.00124028	0.58937	0.0193019	0.00058617	0.126064	0.0783802	0.0683902	0.0159782	0.0618599	1.06394	0.00771382	0.00111192	0.00827966	0.0174039	0.054704	0.109078	0.137334	0.0364515	0.305828
dHB in training set	24	21	27.9	no	M	0.0309752	0.00183002	0.0307555	0.174979	0.0178265	0.215966	0.0473849	0.00389233	0.0272206	0.0078479	0.127007	0.115867	0.00410982	0.294742	0.66716	0.0274825	0.0310356	0.00617864	0.163443	0.311251	0.0822041	0.00441532	0.00260797	0.14996	0.118241	0.0269199	0.633024	0.0158458	0.00811504	0.140904	0.0765564	0.331891	0.00299244	0.0189981	0.384177	0.00836422	0.00404182	0.0112405	0.0199131	0.10219	0.293377	0.343005	0.0542848	0.418091
dHB in training set	68	24	22.1	no	F	0.113504	0.00166443	0.0390435	0.0117442	0.00810281	0.0543062	0.0405991	0.00107692	0.000594453	0.00253001	0.11494	0.0411791	0.00907814	0.349057	0.262603	0.127487	0.0413882	0.00218183	0.0268382	0.0057418	0.0626136	0.00179363	0.00193124	0.0716653	0.0238648	0.013872	0.318852	0.0143952	0.0085301	0.208726	0.0263545	0.231419	0.00302491	0.0317691	0.910909	0.00240814	0.000438951	0.00752984	0.0175069	0.0511791	0.118259	0.244803	0.0269579	0.202087
dHB in training set	70	25	20.8	no	F	0.231665	0.00264787	0.0384413	0.0175921	7.21836e-05	0.186595	0.0563435	0.00307574	0.00997857	0.00280097	0.112977	0.0230394	0.000204945	0.376148	0.151529	0.0982933	0.0604635	0.00143065	0.0336296	0.101595	0.0695463	0.00825674	0.000800209	0.0481206	0.00446495	0.0316467	0.470395	0.0124843	0.0600992	0.0528729	0.0519357	0.0766072	0.0116948	0.0248704	0.00808973	0.00120633	0.000696522	0.00872202	0.0133028	0.038907	0.09219	0.352844	0.0507486	0.201347
dHB in training set	30	25	20.8	no	M	0.081678	0.000982584	0.0275458	0.0895246	0.00437371	0.0558902	0.0538398	0.000912457	0.00474902	0.00306024	0.0580371	0.0401337	0.00414491	0.426042	0.048282	0.22065	0.00945544	0.0021223	0.0493345	0.0204738	0.0288416	0.0037413	0.000994063	0.0528007	0.0253629	0.0209507	0.053192	0.0142465	0.0530857	0.0775431	0.0452581	0.125701	0.00910214	0.0445638	0.12434	0.00456213	0.00122045	0.00295915	0.0089929	0.0142732	0.0944563	0.192247	0.0429022	0.141648
dHB in training set	50	21	26.8	no	M	0.275002	0.00369091	0.0774489	0.233476	0.0104192	0.314111	0.0505854	0.000691059	0.000412063	0.00433631	0.090887	0.0391585	0.00731229	0.458644	0.0860863	0.210962	0.0594877	0.00389498	0.0628557	0.188568	0.0598246	0.00660768	0.000924344	0.0220453	0.0470578	0.0386182	0.585241	0.0241641	0.0389348	0.194481	0.0763434	0.308148	0.00956838	0.0525676	0.0784519	0.00499931	0.000764673	2.38173e-05	0.00354921	0.0557494	0.124534	0.309288	0.0663521	0.494971
dHB in training set	59	25	20.5	no	M	0.164212	0.0033659	0.000609782	0.0043941	0.00180267	0.0231856	0.0250683	9.51237e-05	0.00438421	0.00228584	0.00425209	0.0174298	0.00163457	0.305804	0.0326769	0.09171	0.0403441	0.00211184	0.0307885	0.00245325	0.040507	0.003423	0.000620038	0.0347513	0.0238024	0.0144334	0.0381014	0.0132944	0.0152238	0.132194	0.048142	0.0756587	0.0122951	0.0313318	0.419073	0.00577778	0.00112896	0.00236689	0.00936807	0.0103701	0.0236176	0.0968704	0.0237055	0.159021
dHB in training set	69	27	27.1	telbivudine	M	0.0954687	0.00221426	0.0346091	0.0533783	0.00886021	0.106844	0.0255089	0.00158715	0.00353945	0.000698443	0.0421585	0.0180363	0.00657588	0.40625	0.0493956	0.155827	0.0112374	0.00167541	0.0315895	0.00329043	0.0227251	0.00377721	0.00104582	0.0208375	0.0026618	0.00439433	0.118528	0.00662187	0.0351836	0.212409	0.0261506	0.144223	0.00625535	0.0281923	0.0647268	0.00642518	0.000609803	0.00270964	0.0107143	0.0159395	0.0736101	0.108562	0.0329362	0.1346
dHB in training set	46	26	23.9	no	F	0.0715687	0.00312126	0.0345152	0.127491	0.00650297	0.0986721	0.0323317	0.00308617	0.0114933	0.00202446	0.0545901	0.032254	0.00224834	0.236256	0.0963298	0.138716	0.0314069	0.00269273	0.0171352	0.103803	0.00886472	0.00744043	0.000816265	0.11576	0.0717369	0.0175344	0.0115387	0.0137983	0.00900186	0.116359	0.0361748	0.0343486	0.00382549	0.0172429	0.385836	0.000558593	0.00217284	0.00126903	0.00683688	0.0172337	0.0136331	0.172963	0.0315238	0.299302
dHB in training set	62	18	27	Adefovir dipivoxil	M	0.0850181	0.00272515	0.0127802	0.070973	0.00818723	0.0504578	0.00165192	0.000384864	0.00176562	6.66965e-05	0.0306286	0.027816	0.00285681	0.304913	0.0375937	0.000342845	0.0351557	0.000992975	0.0249839	0.115159	0.0490491	0.00609254	0.00156418	0.0409791	0.0302678	0.0245776	0.0121334	0.00676626	0.046308	0.186525	0.0415088	0.175338	0.0122408	0.0252574	0.611026	0.000672435	0.000976813	0.00209811	0.0167462	0.0111141	0.073514	0.212283	0.00779706	0.1917
dHB in training set	54	23	18.4	no	F	0.0763259	0.00384225	0.0161448	0.0570994	0.0039089	0.0749308	0.00849831	0.000762314	0.00582779	0.000478794	0.0701853	0.0339096	0.00816023	0.32075	0.110191	0.24624	0.045673	0.0026562	0.107032	0.313267	0.0318832	0.00322827	0.000436	0.0113651	0.0344926	0.0323353	0.381815	0.0127452	0.0196317	0.0753287	0.0787329	0.21913	0.0187241	0.0686257	0.855671	0.020487	0.000702423	0.00964954	0.0251221	0.046527	0.0489141	0.268866	0.0662613	0.0943772
dHB in training set	38	29	19.1	no	F	0.162366	0.00285694	0.025491	0.175624	0.001257	0.0182849	0.0361676	0.00344842	0.00746082	0.00882875	0.101751	0.0176389	0.0134766	0.383712	0.165874	0.0581803	0.0339694	0.00446203	0.0690395	0.0880552	0.0631099	0.00916945	0.000911913	0.0889264	0.0698438	0.00187548	0.440107	0.0101386	0.0620355	0.117521	0.038329	0.128853	0.0190519	0.0326081	0.23868	0.00460346	0.00114401	0.00217469	0.0105541	0.0620369	0.0627804	0.482904	0.0290935	0.163843
dHB in training set	67	22	20.6	no	M	0.0609672	0.00172821	0.0235527	0.0535599	0.00122656	0.100998	0.0378346	0.00135611	0.00197928	0.00218317	0.0478913	0.0179589	0.0042756	0.0933046	0.0287339	0.189741	0.00123917	0.00316291	0.0481635	0.0129587	0.078688	0.00344707	0.000496296	0.105703	0.0181897	0.0228557	0.4788	0.0124948	0.026895	0.252672	0.0497239	0.105051	0.0106533	0.0311737	0.278595	0.00874026	0.000324583	0.00928981	0.00853191	0.0267383	0.0184302	0.0767501	0.0408267	0.00854151
dHB in training set	65	21	26.7	no	F	0.0431126	0.00117581	0.0175775	0.0502453	0.00308568	0.103698	0.0703727	2.05703e-05	0.00287076	0.000988082	0.0219737	0.0123999	0.00369915	0.25438	0.0477991	0.195551	0.0148729	0.00272011	0.0100345	0.00954859	0.0716518	0.0029163	0.000621524	0.0211783	0.0561404	0.00518972	0.257819	0.0127892	0.00814879	0.225979	0.0177868	0.0192523	0.00488485	0.0357156	0.51668	0.00308972	0.00171354	0.00452774	0.0120004	0.0456244	0.0850268	0.206079	0.036057	0.149921
dHB in training set	28	25	17.8	no	M	0.0827542	0.00452472	0.0338743	0.0744887	0.00840955	0.0182819	0.0480969	0.00339876	0.0104335	0.000323574	0.0221517	0.0327373	0.0073154	0.36623	0.0797298	0.424862	0.0666923	0.00144299	0.0667098	0.0439492	0.124828	0.00617064	0.00237395	0.0760535	0.0211302	0.0328835	0.273424	0.00952005	0.0441019	0.0200957	0.0796016	0.0431194	0.0157007	0.0365924	0.744313	0.0108304	0.00109568	0.00382325	0.0165341	0.0284194	0.0578757	0.489842	0.0255237	0.0157433
dHB in training set	24	17	24.1	no	M	0.290167	0.00523067	0.0395391	0.248835	0.00632237	0.0836552	0.0625052	0.00196477	0.00310509	0.00569264	0.0721765	0.0105415	0.00800044	0.887807	0.0423794	0.166607	0.0548691	0.0030398	0.0570221	0.061131	0.0805233	0.00371454	0.00142191	0.0754234	0.0478078	0.00166826	0.397458	0.00666536	0.01924	0.292582	0.0671959	0.387802	0.0182898	0.0360228	0.806954	0.0062507	0.000825772	0.00822931	0.00627014	0.06905	0.0336233	0.44721	0.023704	0.253697
dHB in training set	40	26	27.5	no	M	0.0928818	0.00386241	0.0152668	0.17313	0.0065491	0.111089	0.139477	0.00633537	0.00961471	0.00194067	0.0597746	0.106843	0.0358658	0.599245	0.337325	0.144016	0.0240349	0.00485065	0.092746	0.436709	0.0944995	0.0072907	0.00146343	0.0923175	0.0328437	0.0478123	0.360879	0.0264674	0.170654	0.283197	0.0261922	0.300509	0.00817631	0.0639316	0.891849	0.0116472	0.00344114	0.00245385	0.0180704	0.0424804	0.276493	0.390833	0.00586719	0.319732
dHB in training set	42	24	25.4	no	M	0.18339	0.00189339	0.0437539	0.142726	0.00665275	0.0454498	0.0585571	0.00245806	0.0110211	0.00345558	0.152548	0.0403216	0.00252406	0.333423	0.0577102	0.45668	0.100445	0.00389659	0.128026	0.0634106	0.0975515	0.010126	0.00148563	0.138518	0.0166433	0.000924319	0.624821	0.0318885	0.0944596	0.497552	0.103226	0.147841	0.025655	0.0416618	0.0227998	0.00908051	0.00327388	0.0115576	0.0254134	0.0176273	0.148411	0.253983	0.0617698	0.217973
dHB in training set	24	20	27.5	no	M	0.171601	0.00351951	0.0208151	0.0415545	0.00699227	0.0265924	0.0400216	0.000930483	0.000912861	0.00385154	0.0419631	0.0342596	0.00785829	0.168284	0.106197	0.194114	0.066241	0.00249378	0.0483184	0.0671437	0.0236953	0.0057258	0.00164527	0.0375	0.0188538	0.0201818	0.131751	0.00392108	0.0101989	0.213111	0.0508706	0.0897389	0.00142288	0.0191083	0.190595	0.000512357	0.000742687	0.00729503	0.00671674	0.0456479	0.042312	0.180578	0.0336719	0.215935
dHB in training set	20	26	17.7	no	M	0.133911	0.00143754	0.0296975	0.0423192	0.00185233	0.0329454	0.0366227	0.00194613	0.000547693	0.00252447	0.0780343	0.0418185	0.00118261	0.190394	0.000986108	0.0127232	0.0391008	0.00264618	0.0470414	0.00783842	0.0254685	0.00459196	0.000647502	0.0681112	0.0540336	0.0218082	0.233871	0.00404195	0.0307183	0.0744375	0.0424193	0.156367	0.00782155	0.0224716	0.277777	0.00342921	0.000612069	0.00270331	0.00824493	0.0334269	0.0714632	0.137816	0.0217972	0.0611953
dHB in training set	27	28	26.2	no	M	0.116699	0.00221516	0.0438034	0.118444	0.00162579	0.207176	0.103358	0.00274501	0.0126069	0.00299193	0.0347593	0.0327949	0.0149529	0.411745	0.239831	0.0389746	0.0321659	0.00208342	0.0791419	0.164735	0.0165443	0.000531546	0.000446482	0.0662579	0.0314905	0.0128639	0.497611	0.00508617	0.088926	0.284475	0.0704041	0.186127	0.0125496	0.0783474	0.0325255	0.00654707	0.00121469	0.0124656	0.0235916	0.0771586	0.182618	0.152846	0.0323308	0.235611
dHB in training set	71	18	18	no	F	0.0809371	0.00192552	0.0489313	0.00954359	0.00659577	0.0216142	0.0122603	0.00180923	0.0152004	0.00104409	0.0511857	0.00145783	0.000743614	0.462348	0.068139	0.0507674	0.0320883	0.00240821	0.0647078	0.149023	0.0204857	0.00278122	0.00126343	0.000195337	0.052583	0.0192829	0.465379	0.0150624	0.0377417	0.133139	0.0301303	0.145594	0.0060859	0.0543641	0.395248	0.0019059	0.00139098	0.0111112	0.00905167	0.0588127	0.0475047	0.255562	0.0192708	0.199835
dHB in training set	58	17	20.3	Lamivudine	F	0.112046	0.00311542	0.0381468	0.00583218	0.00386629	0.0898259	0.0630803	0.00248866	0.0011556	0.00281549	0.0600191	0.0686388	0.00710705	0.701816	0.0159141	0.00164783	0.061673	0.00104656	0.0724518	0.255636	0.0109604	0.00288552	0.00184462	0.0785786	0.0661378	0.00300497	0.452771	0.013763	0.0548491	0.20288	0.040238	0.118617	0.0161453	0.0646817	0.227886	0.00497331	0.00163322	0.0118826	0.0142544	0.0335213	0.104987	0.186307	0.0285288	0.269609
dHB in training set	59	26	29.7	no	M	0.065351	0.00275401	0.0329861	0.101701	0.000895592	0.0263328	0.0588109	0.00366435	0.0193077	0.00567567	0.159635	0.0749384	0.00612643	0.759632	0.105022	0.266498	0.028813	0.00635306	0.0986974	0.204863	0.0798168	0.0140373	0.00189477	0.17624	0.148302	0.00783915	1.34798	0.0100101	0.0161012	0.0306989	0.0685092	0.225955	0.011849	0.0631937	1.2755	0.00483745	0.00101371	0.0124325	0.0306639	0.0625628	0.037909	0.153285	0.0645136	0.0744639
dHB in training set	66	19	27.8	no	F	0.231058	0.0036232	0.0538208	0.100121	0.00468826	0.131727	0.106998	0.0015658	0.00995385	0.00599389	0.042428	0.0705584	0.0137993	0.503145	0.00229227	0.360808	0.0491643	0.000232541	0.0809026	0.0183844	0.0871524	0.007422	0.00040512	0.0627842	0.0564847	0.0277702	0.318351	0.00944079	0.0491184	0.151134	0.0866224	0.0196334	0.00225933	0.0701034	0.677812	0.016445	0.00179007	0.00198156	0.0143281	0.0347158	0.181729	0.241439	0.0252889	0.208772
dHB in training set	39	20	17.5	no	M	0.0411839	0.00745613	0.0194427	0.18455	0.0159271	0.0319212	0.103748	0.00380333	0.0389387	0.0135004	0.130655	0.0953279	0.00890015	0.598451	0.0684487	0.548436	0.0215023	0.00448597	0.186278	0.169506	0.172807	0.0127135	0.00535098	0.140842	0.0171807	0.0458713	0.506913	0.0240304	0.0131198	0.0897835	0.0921752	0.471409	0.0191421	0.0906672	2.41553	0.00396104	0.0013563	0.0128654	0.0267101	0.156841	0.161887	0.577963	0.0811682	0.280532
dHB in training set	43	27	26	no	F	0.111233	0.00961565	0.0285287	0.289781	0.00157449	0.266188	0.204299	0.00264705	0.012031	0.00858374	0.0404309	0.1287	0.00381596	0.558755	0.465831	0.408646	0.134922	0.00988102	0.106192	0.276364	0.119281	0.0152887	0.00200081	0.311682	0.17942	0.0450546	0.771266	0.0287731	0.0787107	0.317307	0.146958	0.336641	0.00766532	0.0875872	0.618129	0.00198412	0.000193644	0.016949	0.0424398	0.0676154	0.159103	0.447838	0.143262	0.533266
dHB in training set	60	30	15	no	F	0.151859	0.00521857	0.0916979	0.0507143	0.0092291	0.117372	0.0874512	0.00773097	0.00945513	0.00813872	0.248912	0.0345259	0.00910568	0.899235	0.30094	0.688153	0.0903249	0.0034782	0.127048	0.192869	0.0478023	0.0107603	0.00141009	0.292749	0.00793409	0.0444772	0.311628	0.0370912	0.119402	0.439342	0.134084	0.506112	0.00457892	0.0724893	1.21277	0.000670574	0.00418515	0.01239	0.0346371	0.0655051	0.405827	0.217695	0.0563219	0.498344
dHB in training set	69	29	18.3	no	F	0.291868	0.01178	0.101397	0.101118	0.0175272	0.180029	0.145349	0.00118273	0.0214151	0.00818564	0.102959	0.0826783	0.0225126	1.03445	0.335435	0.167909	0.0682305	0.00929684	0.103783	0.0718179	0.106215	0.0172406	0.00138657	0.405763	0.0514028	0.029565	0.519448	0.00896006	0.141601	0.129523	0.107723	0.527292	0.0149231	0.103106	0.994433	0.0334544	0.00135865	0.0353857	0.0345628	0.0513837	0.217478	1.00958	0.129817	0.165885
dHB in training set	34	28	26.1	no	M	0.327337	0.00869285	0.0756185	0.248442	0.00707512	0.0881993	0.238598	0.00880326	0.0129377	0.00330056	0.0467435	0.0780671	0.00328396	0.793773	0.183784	0.966332	0.0204598	0.00217526	0.200022	0.313138	0.0862394	0.0116998	0.00175685	0.124237	0.132413	0.0259701	1.11593	0.0166111	0.0131462	0.189777	0.0841177	0.445254	0.0492418	0.0645599	0.935682	0.00322434	0.000588022	0.00625811	0.0277139	0.167993	0.207308	0.918894	0.0599518	0.411501
dHB in training set	20	28	19.1	telbivudine	F	0.376008	0.00376908	0.0695375	0.135421	0.00661381	0.0543868	0.0671643	0.00413676	0.00717356	0.00739757	0.190902	0.0948326	0.0406112	0.413554	0.0434472	0.174329	0.28568	0.0116429	0.147794	0.143398	0.107476	0.0151809	0.00168547	0.00488068	0.161769	0.0729998	0.690331	0.0472131	0.0274441	0.74404	0.162579	0.38213	0.00264236	0.0522088	1.44811	0.0139381	5.90613e-05	0.0213648	0.0295802	0.0907055	0.137753	0.439008	0.11092	0.387957
dHB in training set	24	28	20	no	M	0.724156	0.00669081	0.10803	0.261399	0.0160434	0.141104	0.0666386	0.00389646	0.00710555	0.00817563	0.163099	0.0458956	0.0162276	1.19518	0.0643397	0.297308	0.166072	0.00477167	0.205312	0.123766	0.0780883	0.0122022	0.00227415	0.162701	0.123505	0.0754347	0.291704	0.0112187	0.123634	0.694336	0.102622	0.00285986	0.0361639	0.0772824	0.262669	0.00214355	0.000310422	0.0208231	0.0258924	0.0596736	0.193819	0.718658	0.0567368	0.377248
dHB in training set	32	26	21.3	no	M	0.187143	0.00396561	0.0305902	0.121725	0.0057315	0.11171	0.00553705	0.00242509	0.0122896	0.00514923	0.00780471	0.0448254	0.00623715	0.61382	0.0669643	0.0288725	0.0331297	0.000939272	0.0660744	0.265561	0.0621536	0.00929552	0.00101057	0.142685	0.064702	0.0205597	0.493689	0.0131486	0.00329434	0.233414	0.0340985	0.0491837	0.0379041	0.0269028	0.893625	0.00495575	0.000859166	0.00690199	0.0206943	0.0753281	0.141456	0.608928	0.0312844	0.196664
dHB in training set	21	21	20.4	interferon	F	0.205662	0.00431881	0.0615471	0.100194	0.0107836	0.144189	0.0991586	0.00183009	0.000901499	0.00505861	0.152268	0.0133311	0.00800009	0.701602	0.201796	0.255106	0.107747	0.00169261	0.150006	0.193878	0.060017	0.0076071	0.00295807	0.131022	0.0853318	0.040694	0.490693	0.0293705	0.0633921	0.165039	0.138773	0.529666	0.00707956	0.070445	0.484641	0.0141467	0.00276628	0.00777568	0.0144927	0.0701761	0.106178	0.398748	0.0442671	0.301801
dHB in training set	51	19	20.5	no	F	0.0159458	0.0039759	0.0113316	0.160917	0.0087658	0.105624	0.0624191	0.0078945	0.0141018	0.000713282	0.000489372	0.0526938	0.00620075	0.377546	0.146878	0.0105736	0.0552225	0.00271394	0.0901748	0.160466	0.0295413	0.00297748	8.52067e-05	0.0471634	0.0857365	0.0582215	0.0390885	0.014021	0.0446582	0.281601	0.0473513	0.210552	0.00448766	0.0316129	0.106517	0.0096044	0.00142165	0.0126298	0.0242991	0.0593844	0.124497	0.150444	0.0433001	0.131557
dHB in training set	39	29	28	no	F	0.250168	0.00208905	0.0736315	0.11517	0.0126641	0.0353821	0.084394	0.00257361	0.0104402	0.00400287	0.0851827	0.0716637	0.0231781	1.01183	0.0184836	0.175194	0.0674918	0.00607628	0.1118	0.141977	0.00836588	0.0135655	0.00485364	0.082418	0.0169447	0.0234525	0.197733	0.00639817	0.0878483	0.109018	0.100594	0.119908	0.00760825	0.00575962	1.34465	0.00268344	0.000101816	0.010368	0.0371563	0.0961144	0.0314177	0.369255	0.0653491	0.153135
dHB in training set	37	29	22.5	no	M	0.0887901	0.00515747	0.0511851	0.0157856	0.00685029	0.275941	0.0702601	0.00205248	0.0150006	0.00387325	0.039801	0.0452523	0.00986025	0.421639	0.095382	0.385367	0.0109003	0.000459327	0.0693563	0.154152	0.0660176	0.00297053	0.0016204	0.0829526	0.0249406	0.0362302	0.535027	0.00943606	0.0220375	0.191592	0.070104	0.208867	0.00743579	0.0691716	0.220724	0.0181539	0.00203564	0.00149548	0.0135484	0.0498445	0.0929582	0.229671	0.0277693	0.217655
dHB in training set	64	27	22.3	Lamivudine	F	0.0112256	0.00599763	0.0433738	0.268028	0.0105832	0.000735508	0.0147935	0.00115504	0.0199047	0.00356532	0.0467171	0.0883002	0.00384464	0.577107	0.257362	0.0138804	0.0337494	0.00222111	0.0695404	0.0828119	0.0470338	0.00412021	0.00197285	0.0881335	0.0348785	0.0687428	0.348066	0.00863289	0.0502012	0.0535162	0.0688356	0.0118811	0.0216361	0.0685086	0.0691485	0.0165699	0.00260156	0.0127101	0.00705843	0.0415405	0.0434378	0.155639	0.0470442	0.407722
dHB in training set	24	21	22.4	no	M	0.0262557	0.000279457	0.0291406	0.0210647	0.00112174	0.134924	0.0534099	0.00233461	0.00916928	0.00302457	0.0784376	0.0234996	0.0095821	0.286659	0.172404	0.0199562	0.0230322	0.00106839	0.0323818	0.0834732	0.0346299	0.00413435	0.000701244	0.0193323	0.0339202	0.00867262	0.0704723	0.00348069	0.00532758	0.110345	0.0400957	0.0613635	0.0155685	0.0272847	0.365778	0.000438783	0.00105364	0.00901007	0.00540695	0.0253259	0.070374	0.114285	0.0157661	0.106071
dHB in training set	51	19	16.3	no	M	0.197885	0.00321751	0.0366121	0.170387	0.00376355	0.019731	0.112157	0.00383707	0.0121649	0.00328711	0.0620534	0.0660496	0.0133838	0.725211	0.0612152	0.0534522	0.0326511	0.0012721	0.0481264	0.102925	0.0898294	0.00450449	0.00140179	0.146786	0.0209558	0.0133495	0.0848419	0.0172218	0.00587655	0.15046	0.0399272	0.171554	0.00882567	0.0202054	0.171333	0.0156459	0.00137653	0.00894271	0.0106329	0.0465911	0.166702	0.476896	0.0376357	0.22144
dHB in training set	64	21	22.1	no	F	0.0189851	0.0022573	0.0164174	0.107478	0.00613484	0.014841	0.0737725	0.00214813	0.00924579	0.00223288	0.0487707	0.0137364	0.00686298	0.281278	0.0274546	0.186964	0.00214207	0.00209611	0.0795046	7.49002e-05	0.0527489	0.00167018	0.00172448	0.0370463	0.0442708	0.0203851	0.0653435	0.0110229	0.0652447	0.147409	0.0697305	0.231041	0.00442232	0.0112772	0.69649	0.00316398	0.000433532	0.00325064	0.00820433	0.0448448	0.00370955	0.238668	0.0231624	0.194759
dHB in training set	61	29	26.2	no	F	0.0316081	0.000637399	0.0239285	0.230131	0.00374763	0.0957481	0.0726997	0.00155041	0.00494927	0.0026718	0.0726091	0.0344477	0.00908268	0.311544	0.128291	0.0306732	0.0533712	0.00558469	0.027613	0.00312726	0.0303976	0.00208997	0.000652868	0.0519101	0.0121458	0.0199263	0.181035	0.00190138	0.0215503	0.128759	0.0362722	0.0996109	0.00612856	0.0348789	0.13711	0.00167676	0.00128236	0.00782838	0.00636358	0.0335666	0.0396055	0.0945395	0.0202536	0.166138
HB in testing set	33	2	21.1	no	M	0.34171	0.00596308	0.0205059	0.105535	0.0113702	0.0676561	0.00327283	0.00390111	0.00344185	0.00385775	0.0617299	0.0548443	0.00747547	0.875177	0.147569	0.00948692	0.0532652	0.00163891	0.0593311	0.243871	0.023059	0.00681182	0.00264403	0.0935673	0.0833921	0.00895495	0.130988	0.00937059	0.0823245	0.358946	0.0609892	0.17624	0.018352	0.0552996	3.2417	0.000194701	0.00051149	0.0101561	0.0234365	0.0701415	0.212679	0.45457	0.0377979	0.135991
HB in testing set	72	3	19.6	Lamivudine	F	0.0531418	0.0121247	0.0519176	0.269632	0.0142875	0.147939	0.119985	0.00483107	0.0176384	0.00505113	0.00559065	0.10032	0.0103664	0.820522	0.356649	0.564522	0.0480111	9.90126e-05	0.0281054	0.117866	0.0927079	0.0126532	0.000345372	0.0514784	0.012616	0.00563732	0.624888	0.0264884	0.0940191	0.569572	0.0863726	0.157131	0.00213808	0.109734	1.2529	0.0140367	0.0011722	0.000713192	0.00288008	0.0483109	0.211611	0.29144	0.0580981	0.250525
HB in testing set	24	1	22.6	no	M	0.260103	0.00332529	0.0363379	0.380711	0.00341035	0.0477485	0.158135	0.00267938	0.0174183	0.00525116	0.38143	0.0908067	0.00385479	1.55815	0.471606	0.505318	0.0721883	0.0040071	0.10538	0.088695	0.00821725	0.00573873	0.00165389	0.0535505	0.0508675	0.0330986	0.246488	0.0529019	0.146146	0.439798	0.0501554	0.283663	0.0308035	0.115986	0.981829	0.00933848	0.00136037	0.0217237	0.0200503	0.12813	0.0555379	0.3594	0.0593345	0.122651
HB in testing set	55	2	26.2	no	F	0.319176	0.0075103	0.0650085	0.0465314	0.00521598	0.299524	0.113786	0.00444357	0.00652827	0.00248747	0.122657	0.0407652	0.0040073	0.0411663	0.256249	0.0982565	0.00215484	0.00255844	0.101464	0.419091	0.0309336	0.0138738	0.00136269	0.0214255	0.0713104	0.0169923	0.17379	0.0267366	0.0320796	0.307962	0.0818587	0.0494282	0.00459918	0.0797331	2.13071	0.0222947	3.32103e-05	0.0148367	0.0352958	0.0418751	0.0671357	0.538425	0.057505	0.241096
HB in testing set	60	1	16	no	F	0.176065	0.00588392	0.0533684	0.234354	0.0124073	0.103479	0.109265	0.00190414	0.0194003	0.00647533	0.0827507	0.0903361	0.00225736	0.959339	0.0705222	1.0023	0.0977661	0.00367864	0.131151	0.0772732	0.0614571	0.00592362	0.00185754	0.130035	0.0250013	0.0493586	0.772905	0.0364099	0.0534978	0.66487	0.0930048	0.0756431	0.00282964	0.0568061	1.79613	0.0155124	0.00373461	0.0158428	0.023225	0.0733759	0.213114	0.059369	0.028577	0.301823
HB in testing set	72	3	24.5	no	M	0.150548	0.00813958	0.0228543	0.0350675	0.0116382	0.179582	0.186217	0.00546964	0.0225854	0.00758995	0.115538	0.0663372	0.0191988	0.955808	0.382565	0.417658	0.0306906	0.00577244	0.136005	0.453055	0.00910036	0.00728188	0.00259465	0.0980059	0.176985	0.0233872	0.615422	0.0345432	0.0485215	0.482528	0.10181	0.0273176	0.00725603	0.084929	0.727564	0.0272715	0.00243265	0.00428201	0.0146255	0.110018	0.178431	0.279563	0.0385605	0.222745
HB in testing set	34	0	16.3	Adefovir dipivoxil	M	0.0792324	0.00166191	0.0214854	0.159094	0.00592483	0.0231855	0.0579606	0.000477625	0.00676943	0.00349001	0.0945765	0.00328719	0.00139528	0.445909	0.140972	0.23941	0.021978	0.00145786	0.043728	0.00943281	0.0617118	0.00786459	0.00102222	0.0526758	0.0544216	0.00679082	0.22412	0.0125635	0.0288052	0.20569	0.0388565	0.155784	0.00503063	0.0323495	0.421133	0.00380394	0.000130936	0.00703325	0.0132925	0.0297296	0.0326493	0.385192	0.0370515	0.17166
HB in testing set	32	3	17.8	no	F	0.09141	0.00184398	0.0296152	0.110561	0.00173167	0.025272	0.0479822	0.00104963	0.00346943	0.00109281	0.0408351	0.0271847	0.00553643	0.089975	0.049851	0.107591	0.0294965	4.4086e-05	0.0299662	0.0308967	0.0316671	0.00268932	0.000896386	0.0187298	0.00700374	0.0105402	0.137929	0.0073739	0.00813749	0.144061	0.0244821	0.134938	0.00461337	0.00649377	0.00773377	0.00361097	0.000170214	0.00502474	0.00349747	0.0319924	0.024375	0.132377	0.0264818	0.0996876
HB in testing set	20	3	17.8	no	M	0.103965	0.00207895	0.0108754	0.0946421	0.00435289	0.0593118	0.033157	0.000147465	0.000466513	0.00146303	0.0160938	0.030931	0.00133241	0.390147	0.0379257	0.08031	0.0227602	0.00127009	0.0119785	0.0713242	0.0269762	0.00228099	0.000140418	0.00142479	0.0297393	0.00488262	0.367925	0.00341119	0.0678174	0.218306	0.0234219	0.137021	0.00348632	0.0172238	0.16137	0.00533559	0.000968569	0.00199127	0.00719363	0.0227272	0.0298194	0.0386102	0.0219402	0.121705
HB in testing set	25	1	29	no	F	0.00279057	0.00205226	0.00127919	0.29513	0.0108743	0.110977	0.0287423	0.00305257	0.0085573	0.00102755	0.059163	0.0403931	0.00238488	0.645984	0.149211	0.128452	0.0774606	0.00242736	0.0543987	0.149325	0.0513387	0.00283441	0.00038331	0.0086207	0.00159302	0.0105369	0.301866	0.0139419	0.0386603	0.120661	0.0435607	0.0827357	0.00781638	0.0512836	0.857568	0.00214587	0.00126259	0.00278594	0.0103886	0.0383757	0.104791	0.590468	0.051458	0.134063
HB in testing set	32	2	21.7	no	M	0.118426	0.00274491	0.014477	0.0576107	0.0034244	0.110808	0.0361488	0.00159769	0.00570851	0.00172958	0.0341453	0.0646615	0.0049788	0.339035	0.131245	0.0922276	0.0409216	0.00314895	0.0484613	0.0854856	0.0160507	0.00431619	0.00124878	0.0400336	0.0744395	0.0139644	0.0211311	0.00641295	0.027552	0.196883	0.0540801	0.158837	0.00489609	0.0314134	0.223033	0.00208852	0.00137317	0.000153647	0.0120444	0.0349538	0.0875602	0.161426	0.0325321	0.177491
HB in testing set	28	0	22.7	no	F	0.106909	0.0018909	0.0100263	0.15278	0.000178568	0.0797579	0.0723196	0.00147353	0.00746453	0.00162687	0.111876	0.0422751	0.00440226	0.288199	0.11533	0.0956947	0.0262877	0.000929083	0.067055	0.0847572	0.014848	0.00287031	0.000665022	0.0468755	0.0155057	0.00188037	0.114374	0.0061196	0.021325	0.117929	0.0277668	0.0492036	0.00710603	0.0257603	0.0614598	0.000940111	0.00114549	0.000939732	0.0129696	0.0124658	0.0312199	0.12536	0.0154216	0.0429343
HB in testing set	47	0	26	no	M	0.157837	0.00283815	0.0178497	0.0414555	0.00159632	0.0868574	0.0148728	0.00241372	0.000450048	0.00145704	0.00574778	0.0141342	0.000282007	0.384739	0.144608	0.00501051	0.0206824	0.00115286	0.0414567	0.142575	0.0356212	0.00303671	0.00109445	0.0437459	0.0468256	0.00769083	0.322107	0.0153699	0.0109541	0.0415634	0.0376254	0.0860863	0.00428493	0.0316387	0.470454	0.00239858	0.00126252	0.00596325	0.0104429	0.0127388	0.0664299	0.140098	0.0319137	0.0808959
HB in testing set	66	0	22.2	Lamivudine	M	0.0863294	0.00332989	0.0238427	0.0947267	1.41143e-05	0.013421	0.0384996	0.000173411	0.00281497	0.00343599	0.0520697	0.0406677	0.00925396	0.316845	0.0223326	0.303992	0.0353428	0.000783828	0.0645609	0.0478492	0.0114085	0.00195792	0.000169944	0.0313526	0.0482594	0.00480664	0.0734002	0.0128798	0.0355613	0.126945	0.0259252	0.0720865	0.00135437	0.0223155	0.372674	0.00739371	0.00172971	0.00102704	0.0060981	0.0406784	0.031663	0.0427494	0.0328453	0.00106042
HB in testing set	38	2	25.1	no	F	0.111733	0.00174103	0.0228019	0.237283	0.0005095	0.00678178	0.0435856	0.000797566	0.00190573	0.0021403	0.0235754	0.0250684	0.00586921	0.278197	0.0947934	0.0141543	0.0102134	0.000814758	0.0422807	0.0979235	0.0169503	0.00571512	0.00127992	0.0614651	0.00233973	0.0170136	0.0755117	0.00687017	0.0264123	0.0719716	0.035007	0.0155102	0.0100938	0.0284535	0.539391	0.00437847	0.000762401	0.00120008	0.00857207	0.0359202	0.0815621	0.0820352	0.0123348	0.0965844
HB in testing set	34	1	27	no	F	0.107522	0.00277684	0.0167953	0.0395801	0.00648165	0.0761848	0.0316974	0.000774329	0.00500507	0.0015656	0.0980451	0.0213722	0.00599578	0.234726	0.0572538	0.122513	0.0508025	0.00140319	0.0395503	0.0875876	0.0224773	0.00442334	0.000992968	0.0396476	0.0210061	0.00790854	0.171686	0.00875975	0.00948912	0.0994014	0.0330993	0.0945624	0.00441423	0.0267814	0.227393	0.00186488	0.000635454	0.00344062	0.0103041	0.0272174	0.0352464	0.155602	0.0207513	0.0838403
HB in testing set	20	1	16.7	no	M	0.09722	0.00164161	0.0205258	0.138306	0.000949328	0.116061	0.0380038	0.000816338	0.00749621	0.00314138	0.0946457	0.0221718	0.00772087	0.25762	0.0157876	0.46364	0.01213	0.000666664	0.0308808	0.116249	0.0462974	0.005067	0.00121684	0.04261	0.0598366	0.0183277	0.224821	0.00972986	0.018131	0.0401396	0.0421229	0.321264	0.0108393	0.0492412	0.573378	0.0180225	0.000523008	0.00815943	0.0113471	0.0425322	0.0372709	0.0243328	0.0301699	0.127419
HB in testing set	56	1	15.9	no	F	0.183048	0.000923956	0.0309293	0.0834342	0.00735613	0.0554375	0.0273943	0.00105671	0.00986746	0.00419704	0.0388656	0.0579812	0.00442014	0.342695	0.113756	0.00412403	0.0450543	0.00174166	0.0138618	0.0656139	0.0297555	0.00654703	0.000525147	0.0674485	0.0782685	0.00363695	0.2202	0.0175498	0.000914914	0.201164	0.0596929	0.125976	0.00531082	0.0416715	0.482685	0.00117597	0.000399102	0.00489409	0.0142672	0.0306756	0.149104	0.289143	0.0100586	0.0860758
HB in testing set	49	3	26.3	no	M	0.246413	0.00348959	0.0310274	0.148723	0.00886135	0.135317	0.0855194	0.000382559	0.00641482	0.000310202	0.0157946	0.0556309	0.00734799	0.475084	0.0250256	0.127366	0.0211205	0.00169274	0.0500812	0.0659201	0.0263488	0.00734394	0.0013837	0.0573807	0.0512483	0.00973568	0.433813	0.00808722	0.0161417	0.337205	0.0452587	0.147995	0.00642525	0.0515646	0.37617	0.00184861	0.00133312	0.00158699	0.0125045	0.0452348	0.034351	0.323772	0.0194478	0.136377
HB in testing set	65	3	18.4	no	F	0.0781877	0.0015091	0.020563	0.0665692	0.00200177	0.0501855	0.0393283	0.000423868	0.00534005	0.000965279	0.00114493	0.0114447	0.00129667	0.199056	0.0856275	0.107973	0.0340768	0.00107128	0.0324781	0.0662692	0.00558375	0.000765526	8.65847e-06	0.0469014	0.012424	0.0152166	0.18359	0.00839694	0.0270563	0.150621	0.0280813	0.0273626	0.0034133	0.0391738	0.73511	0.000663784	0.00038102	0.00579732	0.00382288	0.032597	0.0625517	0.0462954	0.029425	0.0826749
HB in testing set	42	0	26.6	no	F	0.124919	0.00068937	0.00862982	0.107129	0.000444479	0.0398331	0.000287718	0.000366667	0.00582243	0.00171132	0.0361215	0.0304875	0.00429571	0.185167	0.0604876	0.0651321	0.022539	0.000972159	0.00648909	0.0144849	0.0122365	0.00184751	0.000568472	0.0304553	0.00424356	0.00893437	0.00801183	0.00797543	0.0227396	0.125044	0.0271258	0.0263376	4.49636e-05	0.0148575	0.327496	0.000323253	0.000139146	0.000284377	0.00571931	0.023264	0.00716465	0.0536679	0.0107897	0.0616432
HB in testing set	48	3	24.1	interferon	F	0.339878	0.00826564	0.0837018	0.359597	0.00274263	0.22073	0.161788	0.00567286	0.0104513	0.0104712	0.0229298	0.0413302	0.00868746	0.732912	0.0406822	0.0454549	0.110187	0.00671044	0.0602539	0.463544	0.140485	0.0127729	0.00194498	0.107984	0.0211424	0.0429658	0.869904	0.01815	0.0272155	0.678207	0.0757183	0.272055	0.0145809	0.0557863	2.01999	0.0130604	0.00219756	0.00807398	0.028056	0.0864958	0.0848539	0.538718	0.0967402	0.297154
HB in testing set	42	1	17.7	no	M	0.170254	0.00412595	0.00615361	0.328403	0.0167328	0.189315	0.0910908	0.00130067	0.00808367	0.00436585	0.12846	0.0912571	0.00114938	0.524033	0.0989398	0.101558	0.0783612	0.00272427	0.0785929	0.284261	0.108149	0.00145215	0.000282343	0.0466039	0.0621457	0.0218853	0.343698	0.0196393	0.0137356	0.642193	0.0805681	0.0305002	0.0189527	0.059648	0.797634	0.0059181	0.00229855	0.01253	0.0157573	0.0207731	0.125284	0.455056	0.0257652	0.287158
HB in testing set	39	0	21.3	no	F	0.0789644	0.00199391	0.0283219	0.123437	0.00451527	0.250313	0.0888397	0.00066183	0.0123036	0.00419351	0.00921244	0.026612	0.00608639	0.564905	0.0794897	0.0971466	0.0402035	0.000475456	0.0565153	0.151137	0.0445789	0.00428353	0.00030737	0.126794	0.049927	0.00610804	0.0934863	0.0136179	0.0586669	0.0182063	0.0345527	0.0462855	0.00171236	0.0150358	0.156759	0.0122727	0.0010844	0.010448	0.0124523	0.0342989	0.0834154	0.145113	0.0164263	0.15027
HB in testing set	54	0	16.1	Lamivudine	M	0.110489	0.00165591	0.0222764	0.236039	-1.59708e-05	0.00553808	0.0430602	0.000712442	0.00182061	0.00205518	0.0230499	0.0245429	0.00578409	0.276954	0.0942679	0.0129106	0.0096879	0.000729633	0.0417552	0.0966798	0.0157066	0.00563	0.0011948	0.0609396	0.00181426	0.0164882	0.074268	0.0063447	0.0258868	0.070728	0.0344815	0.0149847	0.0101126	0.027928	0.535932	0.00429335	0.000677276	0.00111496	0.00848695	0.0353947	0.0803184	0.0807915	0.0118093	0.0953407
HB in testing set	60	3	22.8	no	F	0.151115	0.00234877	0.0341635	0.00977507	0.00159677	0.0700168	0.041464	0.00214417	0.00655034	0.00535981	0.100011	0.0591811	0.00420942	0.41178	0.15514	0.28652	0.0271143	0.000901319	0.0417672	0.0656571	0.0124302	0.00588116	0.0011395	0.0501066	0.0138478	0.015743	0.493085	0.00541778	0.0212153	0.373429	0.0408284	0.220624	0.00647959	0.0421883	0.835596	0.00228764	0.00155787	0.00676403	0.0129635	0.03328	0.0905313	0.123838	0.0602412	0.158284
HB in testing set	41	2	16.6	no	M	0.358597	0.00385838	0.0341549	0.070603	0.0127975	0.0596177	0.0697528	0.000918788	0.00264186	0.00601187	0.00249147	0.112814	0.0227337	0.657522	0.0578207	0.163355	0.0909138	0.00307563	0.125862	0.405058	0.0134661	0.00625675	0.0031236	0.103295	0.224208	0.0243873	0.422097	0.020536	0.135886	0.425877	0.0668849	0.142845	0.00115193	0.0845815	1.9152	0.00999967	0.00126924	0.0152662	0.0234853	0.00639121	0.0828467	0.222925	0.0727003	0.288971
HB in testing set	24	0	23.4	no	F	0.0611892	0.0020424	0.0252225	0.115388	0.00905754	0.00392806	0.00621026	0.00150542	0.00254123	0.00381413	0.0560563	0.016884	0.00167281	0.476098	0.019166	0.0589434	0.0497855	0.000511647	0.053444	0.0547729	0.0393148	0.00344735	0.00155854	0.0760247	0.00302902	0.00197858	0.0827429	0.0131415	0.0368388	0.113036	0.0608676	0.0282459	0.00895376	0.0242041	0.525586	0.00181807	0.000333845	0.00659011	0.0133165	0.040802	0.0237344	0.0284185	0.0265027	0.185513
HB in testing set	45	1	21.8	no	M	0.0909836	0.00221313	0.0169877	0.166114	0.00666931	0.101065	0.0771271	0.000727237	0.00444471	0.00213237	0.0475653	0.0358581	0.0111864	0.345481	0.0609691	0.0253778	0.0506571	0.000544747	0.037525	0.172435	0.0507917	0.00264612	5.53657e-06	0.0216621	0.0466218	0.00277192	0.232081	0.0113595	0.0136612	0.195493	0.029344	0.210403	0.0116799	0.0508409	0.201199	0.00136165	0.00132145	0.000800637	0.0132688	0.0314371	0.00327687	0.219329	0.0244565	0.15447
HB in testing set	68	2	25.8	no	M	0.0414211	0.00185534	0.0308443	0.200828	0.00374364	0.0435668	0.0394237	0.000803342	0.000155674	0.00279519	0.0357922	0.0299984	0.00631648	0.363828	0.0394176	0.0516615	0.00187403	0.00237672	0.0422362	0.174956	0.0363181	0.00458347	0.00086107	0.0117998	0.00401782	0.00168261	0.211829	0.00970974	0.02992	0.173119	0.0390016	0.082326	0.00269018	0.0226018	0.60965	0.0118563	0.000320942	0.0024462	0.0156872	0.0164048	0.0470517	0.0386444	0.0333641	0.0295539
HB in testing set	50	0	19.8	no	M	0.0720183	0.00120401	0.0161367	0.109517	0.00291943	0.0336855	0.0241459	0.00134947	0.00450459	0.00194364	0.0483751	0.0297785	0.00132273	0.13409	0.0734704	0.161348	0.034299	0.000105659	0.0142505	0.0733327	0.0394969	0.00359068	9.8844e-05	0.00210805	0.0148193	0.011078	0.151613	0.010786	0.0173458	0.270478	0.0197964	0.101868	0.00518329	0.0268642	0.178912	0.0064372	0.00114591	0.00425631	0.00490148	0.0191455	0.0200055	0.168165	0.0203496	0.0818541
HB in testing set	55	0	27.4	no	F	0.288811	0.00494547	0.0482098	0.0140819	0.00321417	0.115705	0.0354107	0.00328936	0.00395262	0.00491843	0.0826889	0.124922	0.00677339	0.97079	0.365359	0.829021	0.0853223	0.0008223	0.0829005	0.355463	0.0917501	0.00714909	0.00224812	0.0697136	0.0289636	0.035026	0.805281	0.0239616	0.064511	0.257338	0.11915	0.36084	0.0064526	0.0295402	0.558644	0.0228807	0.00109161	0.00884103	0.0217504	0.0685918	0.0360499	0.437118	0.047398	0.054564
HB in testing set	48	2	24.8	no	M	0.084769	0.00521674	0.0575258	0.151461	0.00856599	0.0897891	0.112116	0.00175079	0.0160793	0.00748781	0.0200715	0.100125	0.00877386	0.58505	0.144924	0.0809297	0.0356458	0.000591685	0.0427257	0.288636	0.0706698	0.00503467	0.00280903	0.0733407	0.0326901	0.0108019	0.600078	0.0204639	0.0320829	0.801881	0.0628816	0.312663	0.00476692	0.0290004	0.47864	0.00258073	0.00389994	0.00205719	0.0189513	0.0593631	0.0948293	0.334427	0.0222729	0.377987
HB in testing set	66	0	20.9	no	M	0.174997	0.00162195	0.0149856	0.128112	0.00044062	0.00312244	0.0111611	0.000743545	0.0054654	0.00386149	0.0105452	0.0637182	0.00256221	0.320382	0.27302	0.225691	0.00797601	0.0029081	0.0314828	0.182377	0.112524	0.0058986	0.000392457	0.0596982	0.0174636	0.000403327	0.289148	0.0137035	0.0324056	0.0446505	0.0562755	0.171122	0.00322774	0.0397614	0.0151935	0.000374225	0.00173669	0.00667521	0.00977358	0.0474759	0.0398326	0.346978	0.0234465	0.148725
HB in testing set	52	3	16.7	no	M	0.0324135	0.000845095	0.0248569	0.0732423	0.00294946	0.0939679	0.0293246	3.16123e-05	0.00177344	0.00183703	0.0486561	0.0406463	0.00605981	0.280874	0.073812	0.271628	0.0291606	0.00178194	0.0378494	0.0425978	0.0208086	0.00170812	0.000308094	0.030033	0.0227937	0.00491559	0.296841	0.003969	0.0121823	0.0629762	0.0235994	0.0599579	0.00380506	0.0254201	0.595437	0.000643212	0.0007738	0.00283178	0.00886875	0.00993267	0.0258758	0.0849234	0.013977	0.0187351
dHB in testing set	71	18	22.4	no	F	0.0678474	0.00444654	0.0778819	0.196376	0.000379337	0.101924	0.0767141	0.00544329	0.000356979	0.0055477	0.17022	0.113012	0.0110362	0.750297	0.57871	0.38068	0.0673018	0.00659944	0.0968004	0.185565	0.013194	0.0049193	0.00147792	0.115021	0.0301263	0.0266474	0.453784	0.0195977	0.0465578	0.078138	0.0857914	0.25917	0.0214061	0.0880352	0.294045	0.00100451	0.00385213	0.00408878	0.0327985	0.0892665	0.150639	0.0328911	0.0292233	0.355934
dHB in testing set	62	28	18.1	no	F	0.0725351	0.00538739	0.0237904	0.0529439	0.0118342	0.142866	0.107096	0.00473434	0.00655335	0.00389771	0.100409	0.0855212	0.00200169	0.643623	0.183804	0.256286	0.0652589	0.00401573	0.0672313	0.171368	0.0531958	0.01183	0.00276206	0.103576	0.0695641	0.0242761	0.482368	0.0178843	0.00394461	0.100901	0.0763931	0.167267	0.00581427	0.0548521	0.877881	0.0115573	0.000953666	0.0122272	0.0144589	0.0244645	0.219062	0.291356	0.100853	0.165376
dHB in testing set	43	22	18.8	telbivudine	F	0.410497	0.00390835	0.0483575	0.15549	0.0122457	0.144819	0.0559466	0.000335668	0.0037367	0.00311872	0.0361768	0.0676548	0.00373967	0.556009	0.176493	0.500063	0.101723	0.00276658	0.145735	0.0462091	0.010252	0.00451173	0.00501968	0.0276292	0.0117772	0.00924508	0.414601	0.0246196	0.0356004	0.0818321	0.0502437	0.151767	0.0262038	0.067138	1.5427	0.00215138	0.000130284	0.0114102	0.0277441	0.0751189	0.138352	0.160152	0.0923413	0.26752
dHB in testing set	68	21	23.5	no	F	0.307479	0.00681321	0.0492942	0.125581	0.00171525	0.156341	0.026568	0.00187552	0.000297175	0.00199185	0.129749	0.0867577	0.00426301	0.710174	0.0982886	0.159925	0.0455767	0.00390028	0.0936414	0.0167184	0.0270749	0.00677005	0.00263507	0.0161813	0.0639535	0.0140513	0.00971776	0.0197143	0.102987	0.033858	0.0448854	0.189371	0.00460645	0.0449413	1.03175	0.00357797	0.00177331	0.0138763	0.0090233	0.0524082	0.0604489	0.401138	0.0337401	0.234694
dHB in testing set	65	19	20.9	no	F	0.153955	0.00442296	0.0295187	0.0306109	0.0209331	0.275679	0.0703835	0.0048845	0.00728234	0.0065188	0.0944869	0.068187	0.00482912	0.316585	0.257151	0.368428	0.0871663	0.00103825	0.0324011	0.160844	0.0933794	0.00389835	0.00232412	0.0851728	0.112913	0.018102	0.254233	0.0181643	0.0168339	0.165667	0.0507052	0.432712	0.0102958	0.0500677	1.46535	0.00246859	0.000364328	0.0120474	0.0283218	0.044815	0.191758	0.410736	0.0487756	0.427288
dHB in testing set	63	27	20.9	no	F	0.152549	0.0040432	0.0637709	0.0861876	0.00118793	0.156768	0.0822816	0.000210119	0.0121245	0.00174341	0.0272493	0.062077	0.00234973	0.488464	0.0378687	0.0657856	0.064429	0.00316013	0.0728926	0.0898162	0.0110341	0.0084357	0.000489025	0.109923	0.0159143	0.022719	0.372988	0.0081428	0.0140705	0.116602	0.0238966	0.0062993	0.0260591	0.0213792	0.829564	0.00553567	0.000179461	0.0092486	0.0144322	0.0350592	0.158687	0.395282	0.0452743	0.221407
dHB in testing set	66	24	16.4	no	M	0.125455	0.00297654	0.015407	0.172225	0.00104391	0.2374	0.097915	0.000409336	0.0106141	0.000812112	0.0555431	0.0444729	0.00438685	0.6985	0.128481	0.078143	0.0483798	0.00254617	0.0563592	0.138009	0.0133134	0.00103937	0.0009179	0.0195182	0.0234713	0.0233266	0.473355	0.00642538	0.00151197	0.112209	0.0480611	0.206792	0.0141169	0.0360464	0.284064	0.00310458	0.00106223	0.00624159	0.011908	0.0454851	0.0823526	0.0887613	0.0356956	0.172367
dHB in testing set	49	21	27.2	no	M	0.0195717	0.00565355	0.0738258	0.164545	0.00446292	0.0749575	0.119861	0.00208771	0.00651014	0.0070444	0.103894	0.0906485	0.0253084	0.710661	0.341225	0.0293145	0.129499	0.00383655	0.106747	0.0348385	0.0297038	0.00594181	0.00278763	0.151799	0.180562	0.0315956	0.685957	0.0114319	0.0839042	0.0519935	0.130885	0.576201	0.00814313	0.0766477	0.0160049	0.00454684	0.00207398	0.0142863	0.0114641	0.0792247	0.303308	0.598948	0.0702451	0.247755
dHB in testing set	57	21	20.9	no	F	0.195607	0.00464898	0.0329233	0.0840637	0.000324645	0.225562	0.105326	0.00264465	0.00559742	0.00503208	0.0740209	0.0559122	0.00155207	0.332257	0.212437	0.0656562	0.0408697	0.00325379	0.0628386	0.0139038	0.00577127	0.00669739	0.00176031	0.00405897	0.00753683	0.0073934	0.534535	0.0117694	0.00729118	0.0401107	0.0420665	0.0913355	0.0202663	0.0481624	0.942463	0.000210344	0.0017361	0.00035501	0.00966175	0.0369265	0.0896551	0.074713	0.0166405	0.269866
dHB in testing set	33	20	23.3	no	M	0.0581913	0.00205413	0.0214785	0.161252	0.001724	0.203756	0.0604412	0.000908053	0.00752092	0.00171263	0.0223503	0.0322184	0.00822013	0.082194	0.181237	0.250606	0.0306212	0.00197026	0.0493986	0.0289718	0.00790282	0.00473205	0.00148109	0.075865	0.0442032	0.0235833	0.163871	0.00923532	6.00367e-05	0.00328618	0.0407545	0.103933	0.00358738	0.0310621	0.583386	0.0103784	0.00103583	0.00449534	0.00702294	0.0404591	0.0709724	0.173132	0.038122	0.147387
dHB in testing set	31	22	20.1	Lamivudine	M	0.245571	0.00521357	0.0624709	0.206011	0.0133188	0.0977531	0.0315205	0.00252168	0.00387496	0.00620418	0.120453	0.0565871	0.00807684	0.902635	0.276375	0.207169	0.0858087	0.000177718	0.0942712	0.156272	0.10444	0.0171792	0.000461968	0.144731	0.0464608	0.00128918	0.30574	0.0253583	0.0536996	0.191593	0.090156	0.0699416	0.0235861	0.0224328	0.856726	0.0325471	0.00241942	0.000755953	0.0175297	0.110102	0.159132	0.141236	0.0530544	0.265169
dHB in testing set	53	20	19.9	no	F	0.0412004	0.00187878	0.0869582	0.00770758	0.00957387	0.314583	0.0712564	0.0037277	0.0118184	0.00728964	0.117957	0.0822272	0.0272411	0.25093	0.141729	0.0386231	0.0406897	0.00554366	0.177858	0.293033	0.0449222	0.00737541	0.000903214	0.0497516	0.0619521	0.0159673	0.501231	0.0173391	0.00817649	0.50856	0.0550467	0.137626	0.00221055	0.0282237	0.890676	0.0123401	0.00406107	0.00175386	0.0235796	0.0295015	0.205897	0.0694807	0.0146341	0.311631
dHB in testing set	58	26	18.7	no	F	0.161145	0.00498589	0.0253717	0.0758347	0.00725821	0.232494	0.0681156	0.00199884	0.0154267	0.00401877	0.162885	0.111573	0.00821182	0.540746	0.321426	0.0826111	0.0223643	0.00608736	0.100964	0.279059	0.112332	0.00263543	0.00183594	0.153154	0.0363599	0.0224522	0.363993	0.0257633	0.00152003	0.179462	0.0665072	0.0770895	0.0146511	0.0734526	0.0192984	0.0158	0.00347072	0.00542311	0.00967523	0.0379269	0.300766	0.507559	0.03821	0.352146
dHB in testing set	23	20	19.2	no	M	0.123391	0.00219708	0.0564919	0.301357	0.00450407	0.0206448	0.0233807	0.00127088	0.0114468	0.0029007	0.0595447	0.0361374	0.0160421	0.224668	0.0999864	0.0558561	0.0251867	0.00140989	0.0450438	0.0346358	0.0340843	0.0057794	0.00119018	0.00479842	0.0230249	0.0167993	0.10912	0.0111327	0.00191301	0.109835	0.0391893	0.173932	0.0131828	0.0363745	0.00521319	0.0129305	4.11482e-05	0.00632986	0.0147774	0.037658	0.0247336	0.272196	0.0403841	0.254015
dHB in testing set	68	18	22.6	no	M	0.0525311	0.00350311	0.0397946	0.0359746	0.00214208	0.0603539	0.0531134	0.00312848	0.0015989	0.000469157	0.0300716	0.0548183	0.0141356	0.35586	0.164862	0.0174294	0.0795138	0.00195297	0.0331746	0.370432	0.0174838	0.00682289	0.00109261	0.0665396	0.0287835	0.0115772	0.290634	0.0143867	0.02424	0.131839	0.0549366	0.238624	0.0214657	0.0426148	1.72431	0.00374	0.000919214	0.00559831	0.0142827	0.0548352	0.168816	0.040517	0.00571996	0.166978
dHB in testing set	37	25	18.6	no	F	0.0090716	0.00282294	0.0292949	0.104907	0.00578534	0.0372166	0.00612969	0.00306932	0.0102923	0.00199534	0.0255854	0.0386533	0.00818141	0.334847	0.187575	0.156272	0.0259102	0.00102636	0.0575831	0.207487	0.0290668	0.00970256	0.00155315	0.0590168	0.0207957	0.0246208	0.140769	0.00390436	0.0918915	0.148078	0.0518963	0.144483	0.0155021	0.0322983	0.0581749	0.00560289	0.000807283	0.00417671	0.0117638	0.0201668	0.0767509	0.189034	0.0209778	0.26455
dHB in testing set	59	22	26.8	telbivudine	F	0.097436	0.00396035	0.0380921	0.229873	0.0152699	0.237434	0.0536258	0.00133749	0.011003	0.00324595	0.0499719	0.00891194	0.019099	0.45569	0.0766146	0.0908715	0.0742525	0.00222046	0.120952	0.0266999	0.1403	0.00429783	0.000848409	0.0644851	0.116383	0.0188231	0.326386	0.0139902	0.00212831	0.14876	0.0637657	0.0592438	0.0403382	0.0387111	0.056293	0.013423	0.00223832	0.00333126	0.0184233	0.0506169	0.215438	0.383524	0.0488336	0.294356
dHB in testing set	22	29	28	no	M	0.112117	0.00333483	0.0235157	0.186652	0.00558024	0.10486	0.0738953	0.00064034	0.00594417	0.0055796	0.0632295	0.0587695	0.0107595	0.651312	0.197408	0.0651659	0.0570195	0.0019056	0.0660124	0.0331605	0.0371485	0.00829846	0.00131727	0.0271007	0.00590984	0.0410532	0.237739	0.00990688	0.0588993	0.154715	0.0839764	0.185426	0.00580323	0.04619	0.478529	0.00205137	0.00105405	0.00925594	0.0183447	0.0384981	0.101029	0.11266	0.0611752	0.294655
dHB in testing set	52	19	26.2	no	F	0.11867	0.00284501	0.0350832	0.11224	0.00204075	0.0523125	0.117755	0.00277623	0.00635959	0.0026457	0.0733881	0.0426319	0.00684034	0.390405	0.0462696	0.128906	0.0490242	0.00114837	0.0451155	0.20727	0.0509879	0.000237698	0.000942838	0.0836452	0.0739085	0.0154705	0.0947607	0.00214371	0.0337451	0.093608	0.0547596	0.260875	0.021248	0.0470708	0.693586	0.00430711	0.00111501	0.00719493	0.00589247	0.0638295	0.0950934	0.237599	0.0438015	0.088116
dHB in testing set	44	24	20.9	interferon	M	0.132107	0.0033299	0.0210448	0.0485187	0.00666655	0.0698518	0.0858895	0.00112102	0.0101717	0.0019527	0.0460082	0.0602048	0.00211915	0.688933	0.120423	0.104021	0.0793256	0.00201302	0.0467074	0.0588707	0.0391076	0.00430558	0.000665018	0.0422926	0.0904287	0.0203127	0.241641	0.0042092	0.00317125	0.212731	0.0309116	0.19384	0.0142831	0.0231094	0.430909	0.00124612	0.000892819	0.0104506	0.0128432	0.0357723	0.0170729	0.143575	0.0150402	0.143659
dHB in testing set	30	27	26.5	no	F	0.126227	0.00369798	0.0192949	0.0645962	0.00506428	0.0582261	0.0431176	0.00169913	0.00835119	0.00142366	0.00781893	0.0145332	0.0105539	0.195726	0.0208554	0.0561204	0.023001	0.00141421	0.037603	0.0308341	0.00929194	0.00276808	0.000600179	0.0283362	0.00380104	0.0081598	0.0445204	0.00227911	0.0163337	0.274893	0.0433506	0.229428	0.0130372	0.0330276	0.552457	0.0140393	2.33172e-05	0.00105079	0.0190872	0.0522073	0.0587943	0.0174662	0.0373451	0.157376
dHB in testing set	40	21	23.4	no	F	0.0516102	0.00355061	0.019545	0.243233	0.0202678	0.0838388	0.0896225	0.00766761	0.0117589	0.00803037	0.153021	0.0527641	0.00902543	1.28368	0.242436	0.393829	0.0737306	0.00187593	0.120858	0.0983577	0.0497302	0.00122997	0.00154269	0.0422263	0.0200341	0.019817	0.808062	0.0135497	0.083746	0.390515	0.113485	0.311944	9.74643e-06	0.0457825	0.82445	0.00136146	0.00200067	0.011028	0.0301049	0.0817229	0.217058	0.428571	0.028782	0.41696
dHB in testing set	43	19	22.4	no	F	0.192226	0.000748662	0.0198358	0.00303535	0.00115915	0.0663036	0.102929	0.000988832	0.00505537	0.00148934	0.0530697	0.0121557	0.00200019	0.543859	0.115437	0.0129313	0.00360545	0.000630258	0.0550844	0.00538163	0.017599	0.00104614	0.00123953	0.0777118	0.0114686	0.00428566	0.11246	0.00976675	0.0223514	0.160803	0.0585045	0.232868	0.00450108	0.0416823	0.0311595	0.00499456	0.000113484	0.00383731	0.01214	0.0364309	0.0974362	0.373744	0.0243555	0.209586
dHB in testing set	70	26	18.5	no	M	0.0920304	0.00161863	0.0324061	0.101595	0.00442436	0.0977473	0.0118	0.000677384	0.00357571	0.00254145	0.021933	0.0242771	0.0187153	0.247383	0.0287759	0.043201	0.0764254	0.00374763	0.0596722	0.0698569	0.0411427	0.00148872	0.00143745	0.0578676	0.018024	0.0235207	0.473348	0.0119678	0.0236629	0.037346	0.0257257	0.117128	0.002763	0.0616945	0.59846	0.0157694	0.00159303	0.0064897	0.0141993	0.0284673	0.0468937	0.305352	0.0209826	0.0990463
dHB in testing set	68	21	19.7	no	M	0.198482	0.00312941	0.039046	0.123817	0.0106599	0.120159	0.133343	0.00264701	0.000129094	0.00492089	0.124484	0.094359	0.0038637	0.49211	0.245407	0.225352	0.0542028	0.00313247	0.0442776	0.16051	0.0356712	0.0116934	0.000296609	0.062661	0.0550629	0.0319713	0.428548	0.0112851	0.0761811	0.076777	0.0810671	0.175458	0.0063165	0.048882	0.120523	0.0173608	0.00256807	0.0175885	0.0145972	0.0419796	0.0414094	0.359757	0.0619166	0.217114
dHB in testing set	68	24	26	no	M	0.248133	0.00288497	0.00335888	0.253051	0.00319257	0.0679697	0.124008	0.00315944	0.0111464	0.00330508	0.0965427	0.0755401	0.00580173	0.841486	0.155319	0.0405117	0.100836	0.00198193	0.0773051	0.00497031	0.0544439	0.00461823	0.000799532	0.201228	0.112082	0.0148699	0.767015	0.00858899	0.0526269	0.286585	0.0290838	0.256249	0.00942244	0.074714	0.421029	0.0105615	0.00116141	0.00178692	0.0171915	0.0263522	0.106219	0.115212	0.0691154	0.39932
dHB in testing set	47	25	16.9	no	M	0.0168006	0.00293864	0.027836	0.0165912	0.00168658	0.0403383	0.059505	0.00183625	0.00379181	0.00127857	0.082374	0.0034021	0.00395728	0.12057	0.0660961	0.0844616	0.0131587	0.00245824	0.0503927	0.079356	0.0385223	0.00624088	0.00174351	0.0458642	0.0258335	0.0173416	0.0899736	0.00799961	0.0262948	0.115088	0.0154131	0.0869389	0.0097369	0.0138982	0.00983962	0.0082862	0.00132429	0.00252201	0.00620367	0.0240938	0.0658339	0.355013	0.0240302	0.198487
dHB in testing set	65	17	21.8	no	F	0.0122319	0.00258222	0.0163859	0.128064	0.00137284	0.103185	0.062283	0.00138746	0.00837203	0.000999611	0.00934569	0.052678	0.000875648	0.289424	0.201433	0.272468	0.0446076	0.00142606	0.0371368	0.00820019	0.0752472	0.00399973	0.000808026	0.0209197	0.0343389	0.014112	0.0836647	0.00852906	0.0200991	0.0966812	0.0444345	0.252863	0.00650109	0.0437885	0.593265	0.0023568	0.00156575	0.000739942	0.00916423	0.0414185	0.100715	0.20774	0.0216857	0.220667
dHB in testing set	33	20	25.4	telbivudine	F	0.0081769	0.000744221	0.011264	0.019352	0.00830158	0.0852787	0.0473963	0.000688524	0.0017906	0.000899865	0.0605383	0.034775	0.00202848	0.115749	0.0971756	0.0724109	0.0377682	0.00098012	0.0350579	0.03991	0.0658662	0.000689389	0.000129417	0.0450995	0.0174863	0.00986206	0.023563	0.00242697	0.0474315	0.0513953	0.0174311	0.0478515	0.00919499	0.00965553	0.216585	0.00252518	0.000758924	0.00289232	0.00954463	0.0224239	0.109807	0.165385	0.017293	0.156103
dHB in testing set	67	30	22.6	no	M	0.153563	0.0060825	0.0317815	0.281443	0.0146584	0.0674466	0.116546	0.00182094	0.00678638	0.000214444	0.0657432	0.0142	0.0125069	0.603776	0.34681	0.255248	0.0927943	0.00517854	0.13202	0.065741	0.0673362	0.00180972	0.00146099	0.188893	0.164576	0.0618728	1.01913	0.0245083	0.0324645	0.184812	0.0925821	0.149017	0.0212722	0.0893804	0.17099	0.00797235	0.000882004	0.0114952	0.0217534	0.0498646	0.151399	0.786682	0.0571396	0.257448
dHB in testing set	34	21	25.3	Lamivudine	M	0.0703752	0.00255578	0.034031	0.0410079	0.0120101	0.109029	0.0668336	0.00188603	0.00960226	0.000522751	0.0578941	0.0345605	0.00137929	0.404198	0.162979	0.039217	0.0595414	0.00241665	0.0479376	0.0606349	0.0326033	0.00313212	1.81925e-05	0.0403044	0.0626777	0.00638977	0.0823069	0.0202023	0.0116644	0.1118	0.0374229	0.18799	0.0122473	0.0507365	0.130689	0.00237322	0.000520989	0.00259698	0.012165	0.0330306	0.108707	0.145025	0.021314	0.252501
dHB in testing set	24	28	26.2	no	F	0.133441	0.00361407	0.0246071	0.0874423	0.00596281	0.0784668	0.046305	0.00275055	0.00552114	0.00197953	0.0341981	0.0225747	0.0103672	0.187282	0.104135	0.243635	0.0389253	0.00923838	0.0164138	0.0303383	0.0510723	0.00291822	0.000318217	0.0124729	0.0423856	0.0140647	0.0611855	0.0100313	0.0256069	0.0797821	0.0405341	0.280499	0.00168129	0.0181982	0.28741	0.00407815	0.00198656	0.00473024	0.0112206	0.0126902	0.0650449	0.277336	0.0484467	0.0299251
dHB in testing set	67	29	20.3	no	F	0.163338	0.00108652	0.0209158	0.0332749	0.00105166	0.0584293	0.0608773	0.00298401	0.00109268	0.00117919	0.0923175	0.0410088	0.0150497	0.599809	0.120834	0.312247	0.0432121	0.00179798	0.0198603	0.0966851	0.0450692	0.00649874	0.000539365	0.0839276	0.00815647	0.0113531	0.283567	0.0154873	0.0378129	0.120432	0.0824659	0.232849	0.0152485	0.0302699	0.429422	0.00190902	0.00217013	0.00524268	0.00989446	0.0471784	0.18147	0.321746	0.0469033	0.168141
dHB in testing set	24	30	19.1	no	M	0.0998954	0.00499954	0.0380536	0.0825743	0.00364016	0.238462	0.0895547	0.000311593	0.0147664	0.000399615	0.00681569	0.0250136	0.00052358	0.597741	0.203448	0.108208	0.098367	0.00107742	0.0519881	0.00510909	0.0241088	0.00429285	0.000250849	0.0486734	0.04232	0.00140989	0.536134	0.00770961	0.0131703	0.158813	0.0745878	0.0756927	0.0141087	0.05115	0.216272	0.00871768	0.000472352	0.00712345	0.0150268	0.0270459	0.017463	0.237969	0.0346274	0.13385
dHB in testing set	67	25	26.3	no	F	0.354097	0.00563649	0.0880197	0.270466	0.00687381	0.0832398	0.156878	0.000856285	0.0156302	0.000575713	0.0211309	0.0710849	0.00905898	1.06485	0.598129	0.545728	0.047204	0.00626846	0.0494569	0.309142	0.15033	0.0202218	0.00481775	0.112763	0.00936893	0.0707987	1.23204	0.0274723	0.025997	0.208805	0.140619	0.356405	0.00670233	0.0174523	0.63574	0.0346376	0.00190531	0.0246546	0.0306745	0.0936063	0.154835	1.37941	0.00460784	0.235422
dHB in testing set	57	28	26.6	no	M	0.00493056	0.00878422	0.0480846	0.13371	0.00683286	0.0286021	0.233654	0.00329107	0.0133944	0.00507339	0.07769	0.0736099	0.0230154	0.398368	0.0246222	0.0196955	0.0857169	0.00490221	0.104443	0.111119	0.122545	0.010742	0.00220524	0.196944	0.0707042	0.00208808	0.827733	0.0323259	0.0182956	0.0925082	0.104675	0.434659	0.0217195	0.06288	1.83276	0.0105783	0.00268717	0.00285365	0.0290274	0.116915	0.160614	0.566194	0.075886	0.468558
dHB in testing set	70	29	19.2	no	F	0.0393584	0.00171801	0.0193018	0.00667991	0.0063359	0.0168498	0.0939848	0.00110636	0.00730325	0.000817115	0.00228269	0.0365087	0.00172275	0.280029	0.141944	0.0736139	0.0365907	0.00154202	0.0258296	0.0349481	0.0356141	0.00842661	0.000948329	0.0112119	0.0567828	0.00856901	0.37237	0.00258457	0.00136604	0.14986	0.0492295	0.00202041	0.00696748	0.0317873	0.129996	0.00152911	0.00122163	0.00271747	0.010121	0.0239606	0.0339383	0.138405	0.0392883	0.10824
dHB in testing set	42	20	19.8	no	F	0.0847941	0.00109306	0.046631	0.0410967	0.00127547	0.0732852	0.0468501	0.00428413	0.00812597	0.00296174	0.111369	0.0792781	0.00723795	0.31042	0.00143933	0.0561302	0.0237004	0.0014202	0.0427659	0.0844524	0.00266441	0.00401802	0.000230447	0.0217689	0.0170907	0.0128783	0.0952384	0.0125119	0.0437264	0.162445	0.0569251	0.17627	0.00571168	0.0298372	0.49801	0.0152938	0.00178261	0.0108427	0.0186698	0.0594239	0.0288284	0.283888	0.0445969	0.155535
dHB in testing set	53	24	19.8	no	M	0.0716083	0.0010155	0.0239977	0.0537022	0.00100548	0.163618	0.020169	0.00124084	0.00408153	0.00199987	0.0212472	0.0318542	0.0104118	0.135513	0.123945	0.0488714	0.0340491	0.000976691	0.0288092	0.0893306	0.020681	0.000992922	0.000763327	0.0397778	0.0519855	0.0179146	0.188268	0.00178057	0.0240492	0.212948	0.0199749	0.0975971	0.00225714	0.0231907	0.436307	0.00302288	0.000365086	0.000667834	0.00897406	0.0291524	0.0314118	0.0433113	0.0141502	0.269845
dHB in testing set	60	26	15.5	no	M	0.220768	0.00369763	0.0546021	0.256818	0.0194403	0.444225	0.0705427	0.00363242	0.0203659	0.0073314	0.193667	0.0624051	0.00550177	0.83657	0.04735	0.226834	0.119408	0.00136637	0.224643	0.422889	0.0984962	0.0170817	0.00445268	0.159882	0.106462	0.000337275	0.801998	0.0213543	0.0793374	0.747984	0.0871657	0.217704	0.0369121	0.111057	1.33204	0.0328386	0.0054772	0.0161326	0.0209728	0.109787	0.40598	0.212793	0.104855	0.407959
dHB in testing set	24	23	17.2	telbivudine	F	0.434118	0.00497908	0.0443106	0.172588	0.0153391	0.0401977	0.181091	0.00424558	0.0062805	0.00419061	0.0128186	0.0737666	0.0196713	0.916346	0.418186	0.342157	0.129112	0.00475924	0.0893754	0.0966858	0.155095	0.00128264	0.00171361	0.151969	0.0358312	0.0735763	0.629162	0.0362017	0.082167	0.071215	0.146025	0.315158	0.0174977	0.116122	2.358	0.0282421	0.00190763	0.00903629	0.0380753	0.0733575	0.223809	0.722342	0.081515	0.427883
[truncated: 16 more columns]
